# 1 **A new genus of horse from Pleistocene North America**

2

3 Peter D. Heintzman<sup>a,b\*</sup>, Grant D. Zazula<sup>c</sup>, Ross D.E. MacPhee<sup>d</sup>, Eric Scott<sup>e</sup>, James A. Cahill<sup>a</sup>,

4 Brianna K. McHorse<sup>f</sup>, Joshua D. Kapp<sup>a</sup>, Mathias Stiller<sup>a,g</sup>, Matthew J. Wooller<sup>h,i</sup>, Ludovic

5 Orlando<sup>j,k</sup>, John R. Southon<sup>l</sup>, Duane G. Froese<sup>m</sup>, Beth Shapiro<sup>a,n\*</sup>

6

7 <sup>a</sup> Department of Ecology and Evolutionary Biology, University of California Santa Cruz, Santa Cruz, CA

8 95064

9 <sup>b</sup> Tromsø University Museum, UiT - The Arctic University of Norway, 9037 Tromsø, Norway

10 <sup>c</sup> Yukon Palaeontology Program, Government of Yukon, Whitehorse, YT Y1A 2C6, Canada

11 <sup>d</sup> Department of Mammalogy, Division of Vertebrate Zoology, American Museum of Natural History,

12 New York, NY 10024

13 <sup>e</sup> Dr. John D. Cooper Archaeological and Palaeontological Center, California State University Fullerton,

14 Fullerton, CA 92831

15 <sup>f</sup> Department of Organismal and Evolutionary Biology, Harvard University, Cambridge, MA

16 <sup>g</sup> Department of Translational Skin Cancer Research, German Consortium for Translational Cancer

17 Research, D-45141 Essen, Germany

18 <sup>h</sup> College of Fisheries and Ocean Sciences, University of Alaska Fairbanks, 905 N. Koyukuk Dr.,

19 Fairbanks AK 99775 USA

20 <sup>i</sup> Alaska Stable Isotope Facility, Water and Environmental Research Center, University of Alaska

21 Fairbanks, 306 Tanana Loop, Fairbanks AK 99775 USA

22 <sup>j</sup> Centre for GeoGenetics, Natural History Museum of Denmark, Øster Voldgad 5-7, 1350K Copenhagen,

23 Denmark

24 <sup>k</sup> Université de Toulouse, Université Paul Sabatier (UPS), Laboratoire AMIS, CNRS UMR 5288,

25 Toulouse, France

26 <sup>l</sup> Keck-CCAMS Group, Earth System Science Department, University of California, Irvine, CA 92697

27 <sup>m</sup> Department of Earth and Atmospheric Sciences, University of Alberta, Edmonton, AB T6G 2E3,

28 Canada

29 <sup>n</sup> UCSC Genomics Institute, University of California Santa Cruz, Santa Cruz, CA 95064

30

31 **\*Corresponding authors:** Peter D. Heintzman: [peteheintzman@gmail.com](mailto:peteheintzman@gmail.com); Beth Shapiro:

32 [bashapir@ucsc.edu](mailto:bashapir@ucsc.edu)

33

34 **Abstract**

35 The extinct “New World stilt-legged”, or NWSL, equids constitute a perplexing group of  
36 Pleistocene horses endemic to North America. Their slender distal limb bones resemble those of  
37 Asiatic asses, such as the Persian onager. Previous palaeogenetic studies, however, have  
38 suggested a closer relationship to caballine horses than to Asiatic asses. Here, we report complete  
39 mitochondrial and partial nuclear genomes from NWSL equids from across their geographic  
40 range. Although multiple NWSL equid species have been named, our palaeogenomic and  
41 morphometric analyses support the idea that there was only a single species of middle to late  
42 Pleistocene NWSL equid, and demonstrate that it falls outside of crown group *Equus*. We  
43 therefore propose a new genus, *Haringtonhippus*, for the sole species *H. francisci*. Our combined  
44 genomic and phenomic approach to resolving the systematics of extinct megafauna will allow for  
45 an improved understanding of the full extent of the terminal Pleistocene extinction event.

46

## 47 **Introduction**

48 The family that includes modern horses, asses, and zebras, the Equidae, is a classic model of  
49 macroevolution. The excellent fossil record of this family clearly documents its ~55 million year  
50 evolution from dog-sized hyracotheres through many intermediate forms and extinct offshoots to  
51 present-day *Equus*, which comprises all living equid species (MacFadden, 1992). The downside  
52 of this excellent fossil record is that many dubious fossil equid taxa have been erected, a problem  
53 especially acute within Pleistocene *Equus* of North America (Macdonald & Toohey, 1992).  
54 While numerous species are described from the fossil record, molecular data suggest that most  
55 belonged to, or were closely related to, a single, highly variable stout-legged caballine species  
56 that includes the domestic horse, *E. caballus* (Weinstock *et al.*, 2005). The enigmatic and extinct  
57 “New World stilt-legged” (NWSL) forms, however, exhibit a perplexing mix of morphological  
58 characters, including slender, stilt-like distal limb bones with narrow hooves reminiscent of  
59 extant Eurasian hemionines, the Asiatic wild asses (*E. hemionus*, *E. kiang*) (Eisenmann, 1992;  
60 Eisenmann *et al.*, 2008; Harington & Clulow, 1973; Lundelius & Stevens, 1970; Scott, 2004),  
61 and dentitions that have been interpreted as more consistent with either caballine horses  
62 (Lundelius & Stevens, 1970) or hemionines (MacFadden, 1992).

63 On the basis of their slender distal limb bones, the NWSL equids have traditionally been  
64 considered as allied to hemionines (e.g. (Eisenmann *et al.*, 2008; Guthrie, 2003; Scott, 2004;  
65 Skinner & Hibbard, 1972)). Palaeogenetic analyses based on mitochondrial DNA (mtDNA)  
66 have, however, consistently placed NWSL equids closer to caballine horses (Der Sarkissian *et*  
67 *al.*, 2015; Orlando *et al.*, 2008, 2009; Vilstrup *et al.*, 2013; Weinstock *et al.*, 2005). The current  
68 mtDNA-based phylogenetic model therefore suggests that the stilt-legged morphology arose  
69 independently in the New and Old Worlds (Weinstock *et al.*, 2005), and may represent

70 convergent adaptations to arid climates and habitats (Eisenmann, 1985). However, these models  
71 have been based on two questionable sources. The first is based on 4 short control region  
72 sequences (<1000 base pairs, bp; (Weinstock *et al.*, 2005)), a data type that can be unreliable for  
73 resolving the placement of major equid groups (Der Sarkissian *et al.*, 2015; Orlando *et al.*, 2009).  
74 The second consist of 2 mitochondrial genome sequences (Vilstrup *et al.*, 2013) that are either  
75 incomplete or otherwise problematic (see Results). Given continuing uncertainty regarding the  
76 phylogenetic placement of NWSL equids—which impedes our understanding of Pleistocene  
77 equid evolution in general—we therefore sought to resolve their position using multiple  
78 mitochondrial and partial nuclear genomes from specimens representing as many parts of late  
79 Pleistocene North America as possible.

80         The earliest recognized NWSL equid fossils date to the late Pliocene/early Pleistocene  
81 (~2-3 million years ago, Ma) of New Mexico (Azzaroli & Voorhies, 1993; Eisenmann, 2003;  
82 Eisenmann *et al.*, 2008)). Middle and late Pleistocene forms tended to be smaller in stature than  
83 their early Pleistocene kin, and ranged across southern and extreme northwestern North America  
84 (i.e., eastern Beringia, which includes Alaska, USA and Yukon Territory, Canada). NWSL  
85 equids have been assigned to several named species, such as *E. tau* Owen 1869, *E. francisci* Hay  
86 1915, *E. calobatus* Troxell 1915, and *E. (Asinus) cf. kiang*, but there is considerable confusion  
87 and disagreement regarding their taxonomy. Consequently, some researchers have chosen to  
88 refer to them collectively as *Equus (Hemionus) spp.* (Guthrie, 2003; Scott, 2004), or avoid a  
89 formal taxonomic designation altogether (Der Sarkissian *et al.*, 2015; Vilstrup *et al.*, 2013;  
90 Weinstock *et al.*, 2005). Using our phylogenetic framework and comparisons between specimens  
91 identified by palaeogenomics and/or morphology, we attempted to determine the taxonomy of  
92 middle-late Pleistocene NWSL equids.

93 Radiocarbon ( $^{14}\text{C}$ ) dates from Gypsum Cave, Nevada, confirm that NWSL equids  
94 persisted in areas south of the continental ice sheets during the last glacial maximum (LGM;  
95 ~26-19 thousand radiocarbon years before present (ka BP; (Clark *et al.*, 2009)) until near the  
96 terminal Pleistocene, ~13 thousand radiocarbon years before present ( $^{14}\text{C}$  ka BP) (Weinstock *et*  
97 *al.*, 2005), soon after which they became extinct, along with their caballine counterparts and  
98 most other coeval species of megafauna (Koch & Barnosky, 2006). This contrasts with dates  
99 from unglaciated eastern Beringia, where NWSL equids were seemingly extirpated locally  
100 during a relatively mild interstadial interval centered on ~31  $^{14}\text{C}$  ka BP (Guthrie, 2003), thus  
101 prior to the LGM (Clark *et al.*, 2009), final loss of caballine horses (Guthrie, 2003, 2006), and  
102 arrival of humans in the region (Guthrie, 2006). The apparently discrepant extirpation  
103 chronology between NWSL equids south and north of the continental ice sheets implies that their  
104 populations responded variably to demographic pressures in different parts of their range, which  
105 is consistent with results from some other megafauna (Guthrie, 2006; Heintzman *et al.*, 2015;  
106 Zazula *et al.*, 2014). To further test this extinction chronology, we generated new radiocarbon  
107 dates from eastern Beringian NWSL equids.

108 We analyzed 26 full mitochondrial genomes and 17 partial nuclear genomes from late  
109 Pleistocene NWSL equids, which revealed that individuals from both eastern Beringia and  
110 southern North America form a single well-supported clade that falls outside the diversity of  
111 *Equus* and diverged from the lineage leading to *Equus* during the latest Miocene or early  
112 Pliocene. This novel and robust phylogenetic placement warrants the recognition of NWSL  
113 equids as a distinct genus, which we here name *Haringtonhippus*. After reviewing potential  
114 species names, and conducting morphometric and anatomical comparisons, we determined that  
115 *francisci* Hay is the most well-supported species name, and we therefore refer the analyzed

116 NWSL equid specimens to *H. francisci*. New radiocarbon dates revealed that *H. francisci* was  
117 extirpated in eastern Beringia ~14 <sup>14</sup>C ka BP. In light of our analyses, we review the Plio-  
118 Pleistocene evolutionary history of equids, and the implications for the systematics of equids and  
119 other Pleistocene megafauna.  
120

## 121 **Results**

### 122 **Phylogeny of North American late Pleistocene and extant equids**

123 We reconstructed whole mitochondrial genomes from 26 NWSL equids and four New World  
124 caballine *Equus* (two *E. lambei*, two *E. cf. scotti*). Using these and mitochondrial genomes of  
125 representatives from all extant and several late Pleistocene equids, we estimated a mitochondrial  
126 phylogeny, using a variety of outgroups (Appendix 1, Supplementary tables 1-2 and  
127 Supplementary file 1). The resulting phylogeny is mostly consistent with previous studies (Der  
128 Sarkissian *et al.*, 2015; Vilstrup *et al.*, 2013), including confirmation of NWSL equid monophyly  
129 (Weinstock *et al.*, 2005). However, we recover a strongly supported placement of the NWSL  
130 equid clade outside of crown group diversity (*Equus*), but closer to *Equus* than to *Hippidion*  
131 (Figure 1 and Appendix 2, Figure 1-Figure supplement 1a and Supplementary tables 1-3). In  
132 contrast, previous palaeogenetic studies placed the NWSL equids within crown group *Equus*,  
133 closer to caballine horses than to non-caballine asses and zebras (Der Sarkissian *et al.*, 2015;  
134 Orlando *et al.*, 2008, 2009; Vilstrup *et al.*, 2013; Weinstock *et al.*, 2005). To explore possible  
135 causes for this discrepancy, we reconstructed mitochondrial genomes from previously sequenced  
136 NWSL equid specimens and used a maximum likelihood evolutionary placement algorithm  
137 (Berger *et al.*, 2011) to place these published sequences in our phylogeny *a posteriori*. These  
138 analyses suggested that previous results were likely due to a combination of outgroup choice and  
139 the use of short, incomplete, or problematic mtDNA sequences (Appendix 2 and Supplementary  
140 table 4).

141 To confirm the mtDNA result that NWSL equids fall outside of crown group equid  
142 diversity, we sequenced and compared partial nuclear genomes from 17 NWSL equids to a  
143 caballine (horse) and a non-caballine (donkey) reference genome. After controlling for reference



144 genome and ancient DNA fragment length artifacts (Appendices 1-2), we examined differences  
145 in relative private transversion frequency between these genomes (Appendix 1-figure 1). We  
146 found that the relative private transversion frequency for NWSL equids was ~1.4-1.5 times  
147 greater than that for horse or donkey (Appendix 2, Supplementary table 5, Figure 1-Figure  
148 supplement 2, and Supplementary file 2). This result supports the placement of NWSL equids as  
149 sister to the horse-donkey clade (Figure 1-Figure supplement 3), the latter of which is  
150 representative of living *Equus* diversity (e.g. (Der Sarkissian *et al.*, 2015; Jónsson *et al.*, 2014)),  
151 and is therefore congruent with the mitochondrial genomic analyses.

152

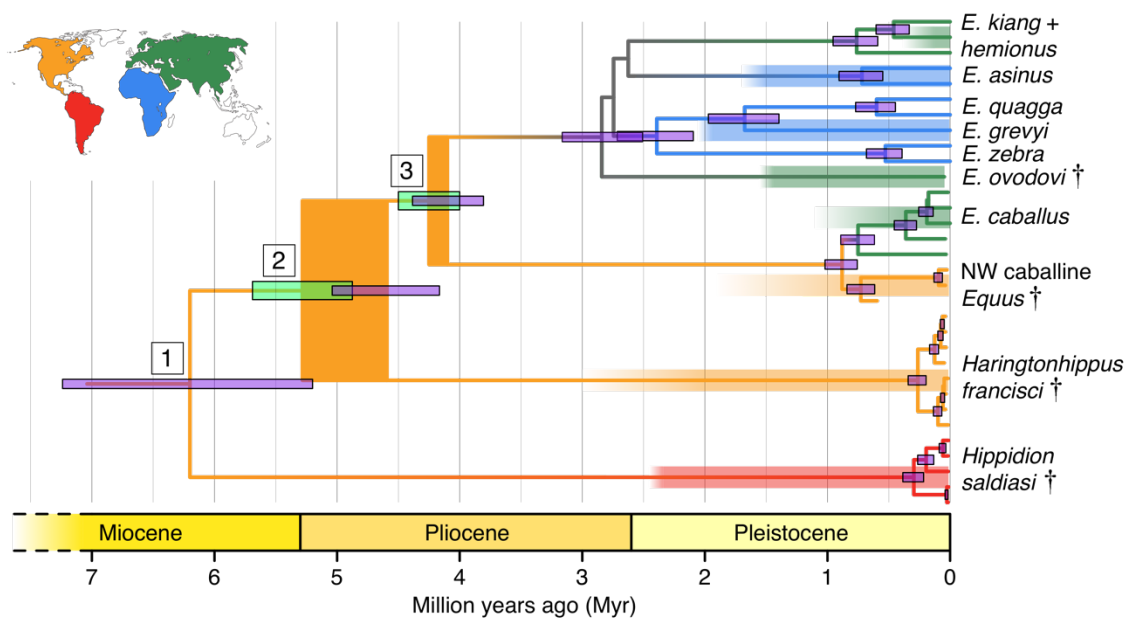

153

154 **Figure 1.** Phylogeny of extant and middle-late Pleistocene equids, as inferred from the Bayesian  
155 analysis of full mitochondrial genomes. Purple node bars illustrate the 95% highest posterior  
156 density of node heights and are shown for nodes with >0.99 posterior probability support. The  
157 range of divergence estimates derived from the analysis of nuclear genomes is shown by the  
158 thicker lime green node bars ((Orlando *et al.*, 2013); this study). Major nodes are labelled with

159 boxed numbers. The thicknesses of nodes 2 and 3 represent the range between the median  
 160 nuclear and mitochondrial genomic divergence estimates. Branches are coloured based on  
 161 species provenance and the most parsimonious biogeographic scenario given the data, with gray  
 162 indicating ambiguity. Fossil record occurrences for major represented groups (including South  
 163 American *Hippidion*, New World stilt-legged equids, and Old World Sussemiones) are  
 164 represented by the geographically-coloured bars, with fade indicating uncertainty in the first  
 165 appearance datum (after (Eisenmann *et al.*, 2008; Forsten, 1992; O’Dea *et al.*, 2016; Orlando *et*  
 166 *al.*, 2013) and references therein). The Asiatic ass species (*E. kiang*, *E. hemionus*) are not  
 167 reciprocally monophyletic based on the analyzed mitochondrial genomes, and so the Asiatic ass  
 168 clade is shown as ‘*E. kiang* + *hemionus*’. Daggers denote extinct taxa. NW: New World.  
 169

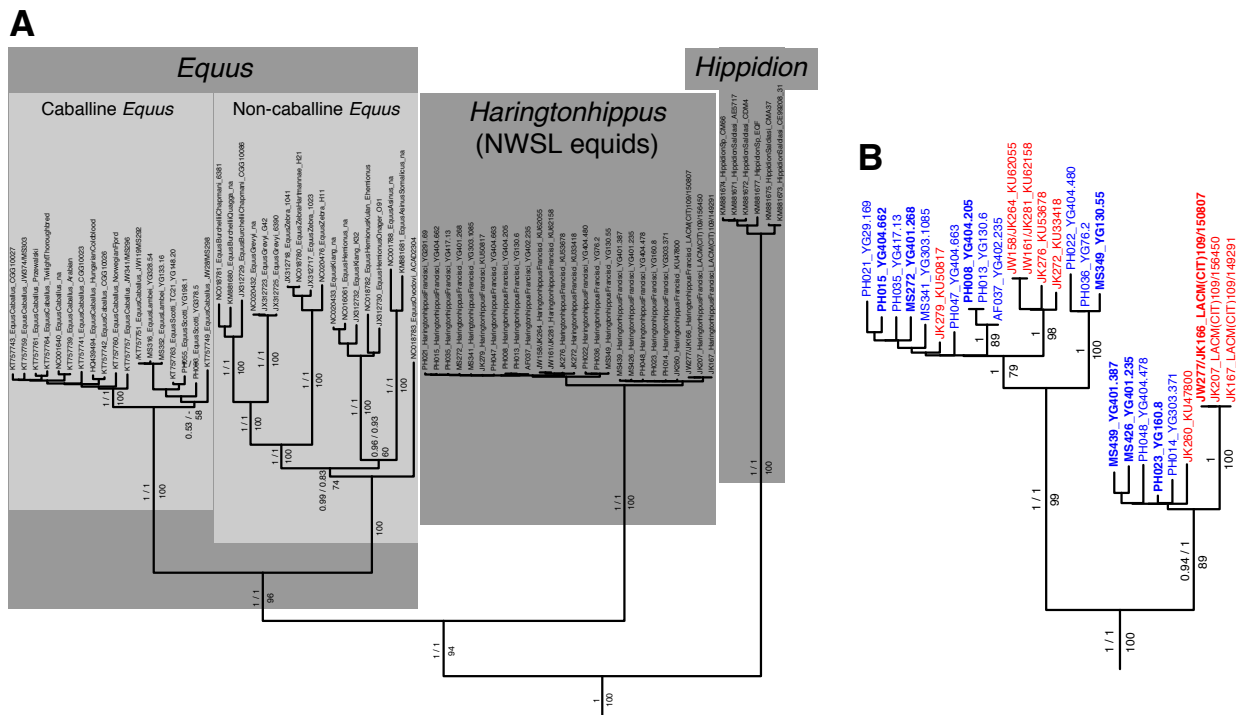

170  
 171 **Figure 1-Figure supplement 1.** An example maximum likelihood (ML) phylogeny of equid  
 172 mitochondrial genomes. This topology resulted from the analysis of mtDNA data set 3 (see

173 Appendix 1) with all partitions and *Hippidion* included, and dog and ceratomorphs as outgroup  
174 (not shown). Numbers above branches are Bayesian posterior probability support values from  
175 equivalent MrBayes and BEAST analyses, with those below indicating ML bootstrap values  
176 calculated in RAxML, and are shown for major nodes. (A) Full phylogeny of the analyzed equid  
177 sequences. (B) The *Haringtonhippus* (NWSL equid) clade, with tips color coded by geographic  
178 origin: Beringia, blue; contiguous USA, red. Tips in bold were included in the BEAST analysis  
179 (see also Supplementary file 1).

180

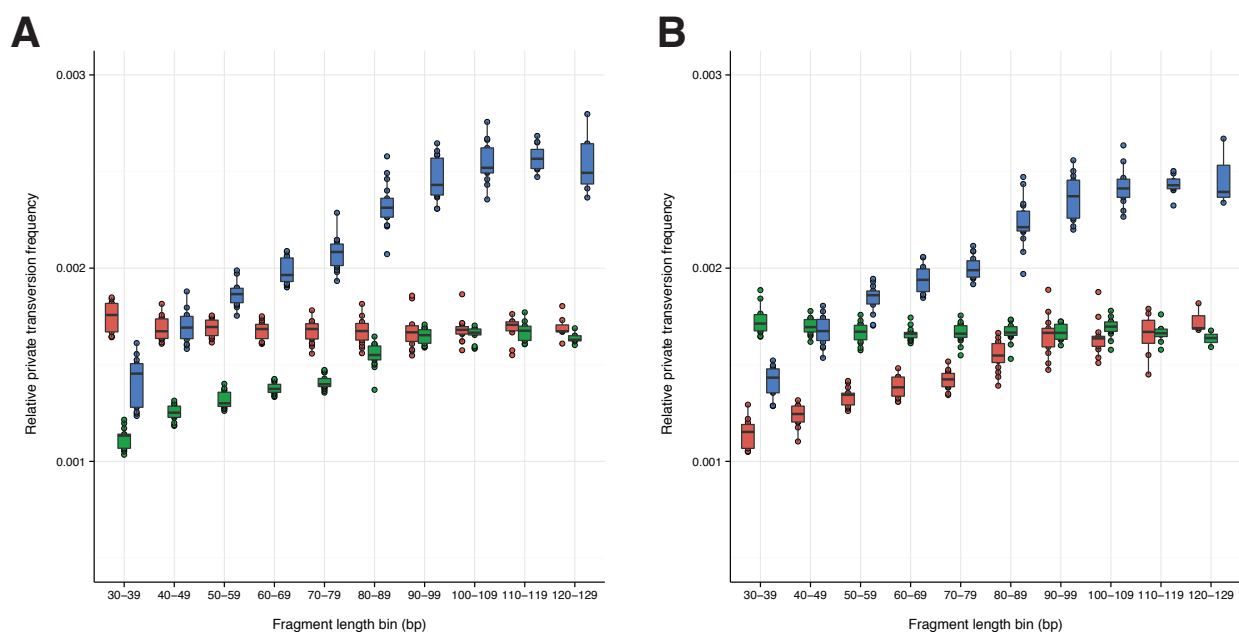

181

182 **Figure 1-Figure supplement 2.** A comparison of relative private transversion frequencies  
183 between the nuclear genomes of a caballine *Equus* (horse, *E. caballus*; green), a non-caballine  
184 *Equus* (donkey, *E. asinus*; red), and 17 NWSL equids (= *Haringtonhippus francisci*; blue) at  
185 different read lengths, with reads divided into 10 base pair (bp) bins. Analyses are based on  
186 alignment to the horse (A) or donkey (B) genome coordinates. To account for bins with low data  
187 content, we only display comparisons with at least 200,000 observable sites.

188

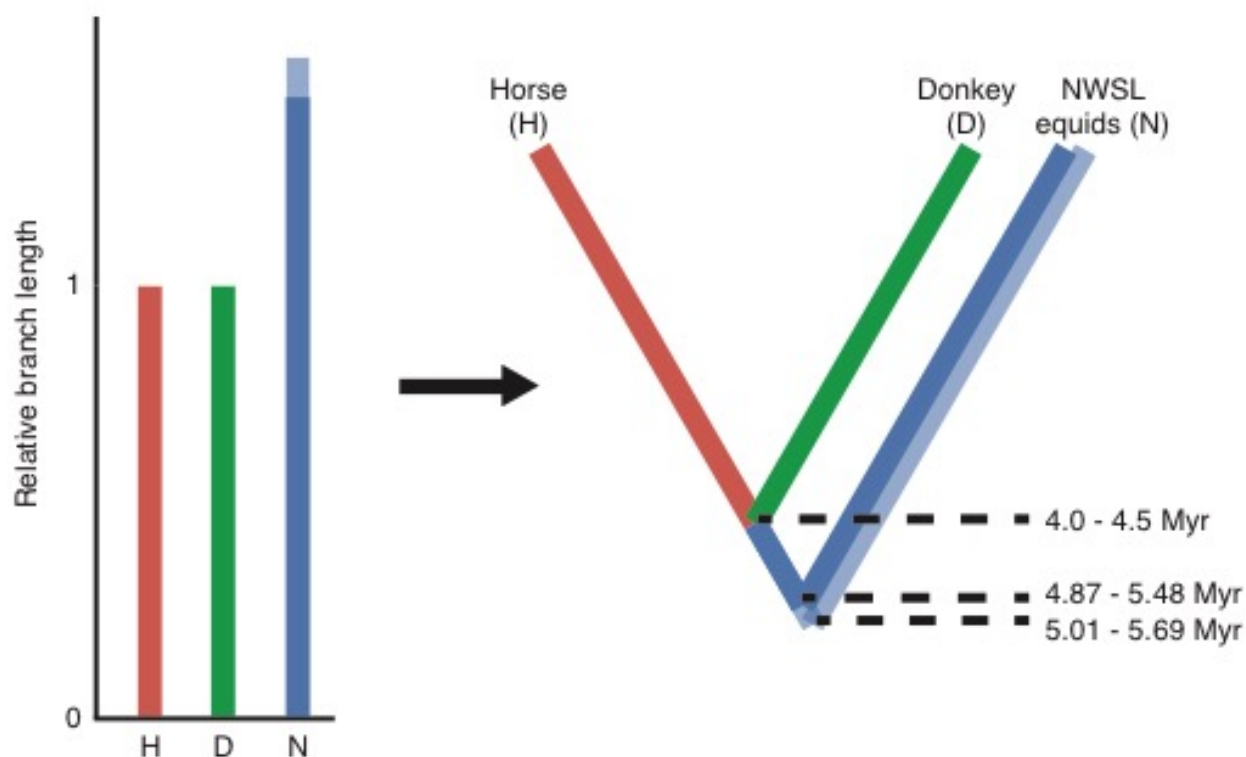

190

191 **Figure 1-Figure supplement 3.** Calculation of divergence date estimates from nuclear genome

192 data. Relative branch lengths are from Supplementary table 5. Minimum (darker blue) and

193 maximum (lighter blue) estimates are shown for the NWSL equid branch.

194

### 195 **Divergence times of *Hippidion*, NWSL equids, and *Equus***

196 We estimated the divergence times between the lineages leading to *Hippidion*, the NWSL

197 equids, and *Equus*. We first applied a Bayesian time-tree approach to the whole mitochondrial

198 genome data. This gave divergence estimates for the *Hippidion*-NWSL/*Equus* split (node 1) at

199 5.15-7.66 Ma, consistent with (Der Sarkissian *et al.*, 2015), the NWSL-*Equus* split (node 2) at

200 4.09-5.13 Ma, and the caballine/non-caballine *Equus* split (node 3) at 3.77-4.40 Ma (Figure 1

and Supplementary table 3). These estimates suggest that the NWSL-*Equus* mitochondrial split

201 occurred only ~500 thousand years (ka) prior to the caballine/non-caballine *Equus* split. We then  
202 estimated the NWSL-*Equus* divergence time using relative private transversion frequency ratios  
203 between the nuclear genomes, assuming a caballine/non-caballine *Equus* divergence estimate of  
204 4-4.5 Ma (Orlando *et al.*, 2013) and a genome-wide strict molecular clock (following  
205 (Heintzman *et al.*, 2015)). This analysis yielded a divergence estimate of 4.87-5.69 Ma (Figure  
206 1-Figure supplement 3), which overlaps with that obtained from the relaxed clock analysis of  
207 whole mitochondrial genome data (Figure 1). These analyses suggest that the NWSL equid and  
208 *Equus* clades diverged during the latest Miocene or early Pliocene (4.1-5.7 Ma; late Hemphillian  
209 or earliest Blancan).

210

## 211 **Systematic Palaeontology**

212 Previous palaeontological and palaeogenetic studies have uniformly placed NWSL equids within  
213 genus *Equus* (Der Sarkissian *et al.*, 2015; Harington & Clulow, 1973; Orlando *et al.*, 2008, 2009;  
214 Scott, 2004; Vilstrup *et al.*, 2013; Weinstock *et al.*, 2005). This, however, conflicts with the  
215 phylogenetic signal provided by palaeogenomic data, which strongly suggest that NWSL equids  
216 fall outside the confines of this genus. Nor is there any morphological or genetic evidence  
217 warranting the assignment of NWSL equids to an existing extinct taxon such as *Hippidion*. We  
218 therefore erect a new genus for NWSL equids, *Haringtonhippus*, as defined and delimited below:

219

220 Order: Perissodactyla, Owen 1848

221 Family: Equidae, Linnaeus 1758

222 Subfamily: Equinae, Steinmann & Döderlein 1890

223 Tribe: Equini, Gray 1821

224 Genus: *Haringtonhippus*, gen. nov.

225

226 *Type species. Haringtonhippus francisci* Hay 1915.

227

228 *Etymology.* The new genus is named in honor of C. Richard Harington, who first described

229 NWSL equids from eastern Beringia (Harington & Clulow, 1973). ‘*Hippus*’ is from the Greek

230 word for horse, and so *Haringtonhippus* is implied to mean ‘Harington’s horse’.

231

232 *Holotype.* A partial skeleton consisting of a complete cranium, mandible, and a stilt-legged third

233 metatarsal (MTIII) (Figure 2a and Figure 2-Figure supplement 1b), which is curated at the

234 University of Texas, Austin (Texas Memorial Museum (TMM) 34-2518). This specimen is the

235 holotype of ‘*E. francisci*, originally described by Hay (1915), and is from the middle

236 Pleistocene Lissie Formation of Wharton County, Texas (Hay, 1915; Lundelius & Stevens,

237 1970).).

238

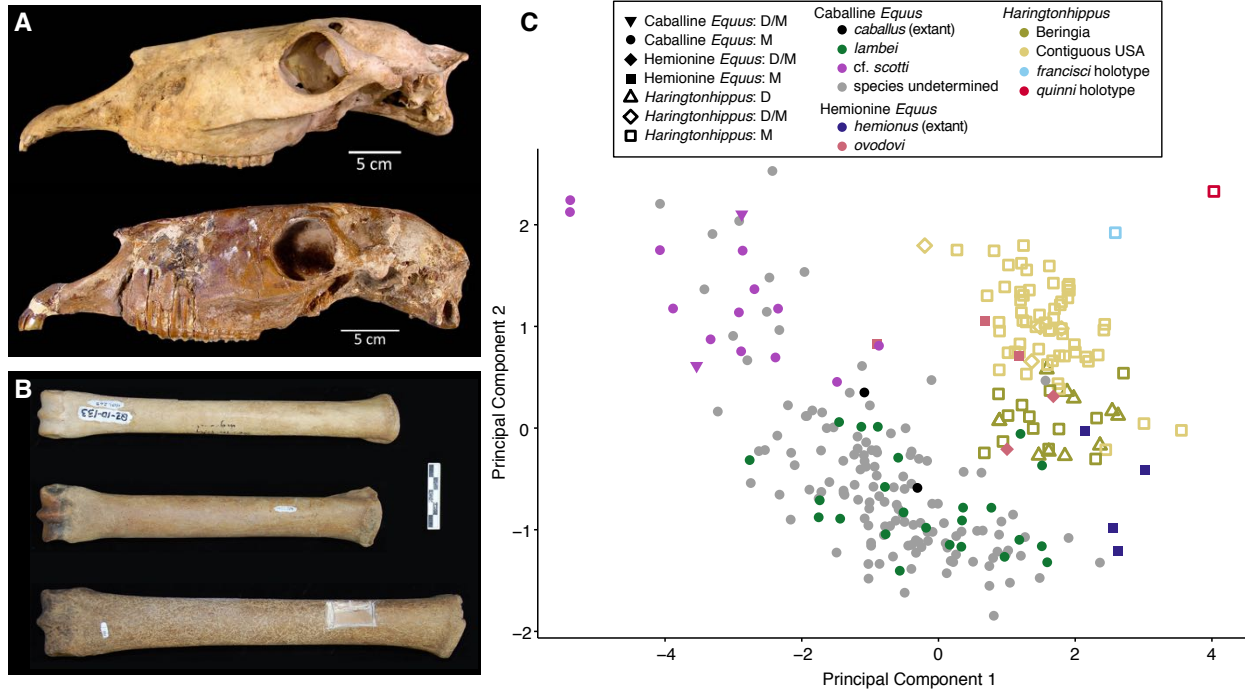

239

240 **Figure 2.** Morphological analysis of extant and middle-late Pleistocene equids. (A) Crania of  
 241 *Haringtonhippus francisci*, upper: LACM(CIT) 109/156450 from Nevada, lower: TMM 34-2518  
 242 from Texas. (B) From upper to lower, third metatarsals of: *H. francisci* (YG 401.268), *E. lambei*  
 243 (YG 421.84), and *E. cf. scotti* (YG 198.1) from Yukon. Scale bar is 5 cm. (C) Principal  
 244 component analysis of selected third metatarsals from extant and middle-late Pleistocene equids,  
 245 showing clear clustering of stilt-legged (hemionine(-like) *Equus* and *H. francisci*) from stout-  
 246 legged (caballine *Equus*) specimens (see also Supplementary file 4). The first and second  
 247 principal components explain 95% of the variance. Specimen identifications were derived from  
 248 DNA (D) and/or morphology (M).

249

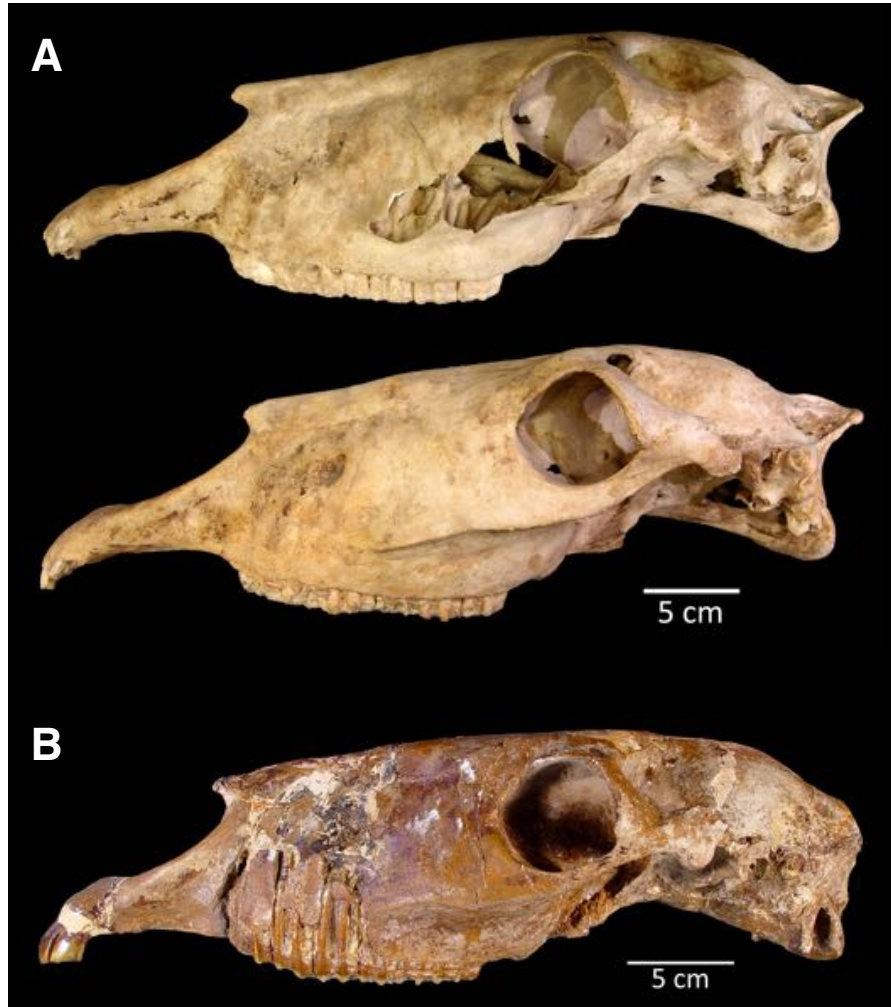

250

251 **Figure 2-Figure supplement 1.** The two crania assigned to *H. francisci*. (A) LACM(CIT)  
252 109/156450 from Nevada, identified through mitochondrial and nuclear palaeogenomic analysis.  
253 Upper: right side (reflected for comparison), lower: left side. (B) Part of the *H. francisci*  
254 holotype, TMM 34-2518 from Texas.

255



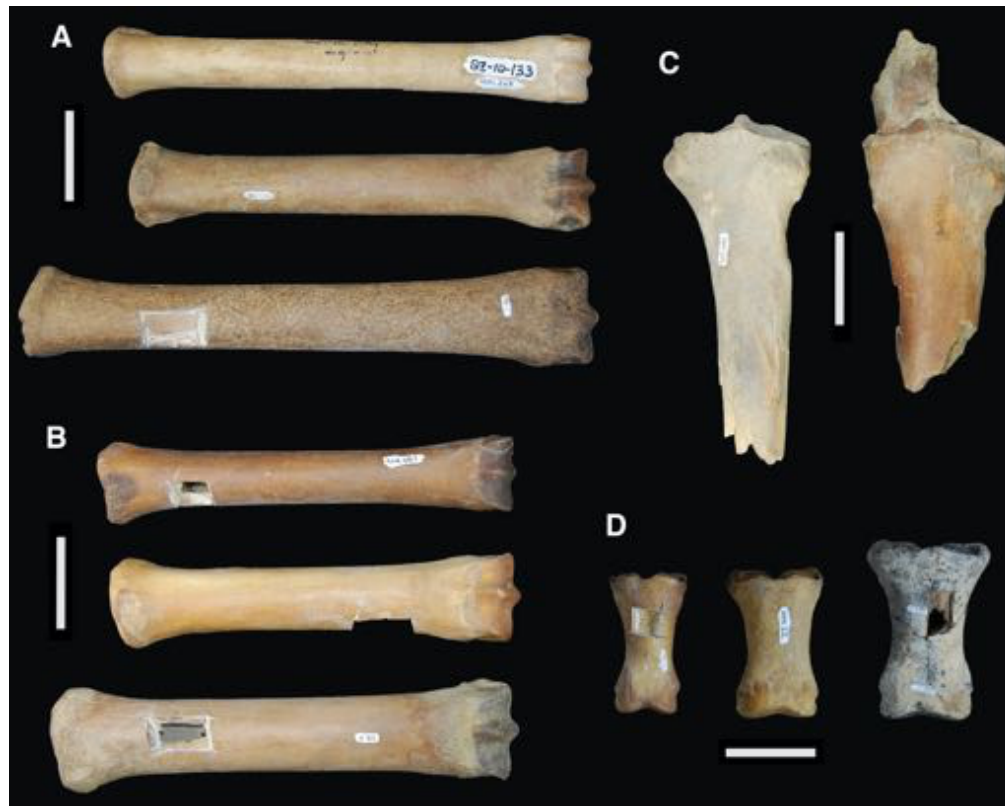

256

257 **Figure 2-Figure supplement 2.** Comparison between the limb bones of *H. francisci*, *E. lambei*,  
258 and *E. cf. scotti* from Yukon. (A) Third metatarsals from *H. francisci* (upper; YG 401.268), *E.*  
259 *lambei* (middle; YG 421.84), and *E. cf. scotti* (lower; YG 198.1). (B) Third metacarpals from *H.*  
260 *francisci* (upper; YG 404.663), *E. lambei* (middle; YG 109.6), and *E. cf. scotti* (lower; YG  
261 378.15). (C) Proximal fragments of radii from *H. francisci* (left; YG 303.1085), and *E. lambei*  
262 (right; YG 303.325). (D) First phalanges from *H. francisci* (left; YG 130.3), *E. lambei* (middle;  
263 YG 404.22), and *E. cf. scotti* (right; YG 168.1).

264

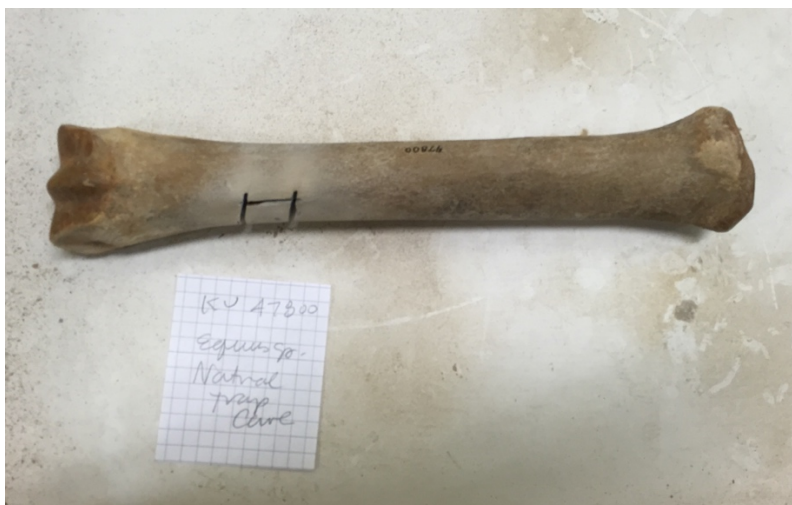

265

266 **Figure 2-Figure supplement 3.** An example equid metacarpal from Natural Trap Cave,  
267 Wyoming (KU 47800; JK260), originally referred to *Equus* sp., but here identified as *H.*  
268 *francisci* on the basis of mitochondrial and nuclear genome data. We note the relative  
269 slenderness of this specimen, which is comparable to YG 404.663 (*H. francisci*) from Yukon in  
270 Figure 2-Figure supplement 2.

271

272

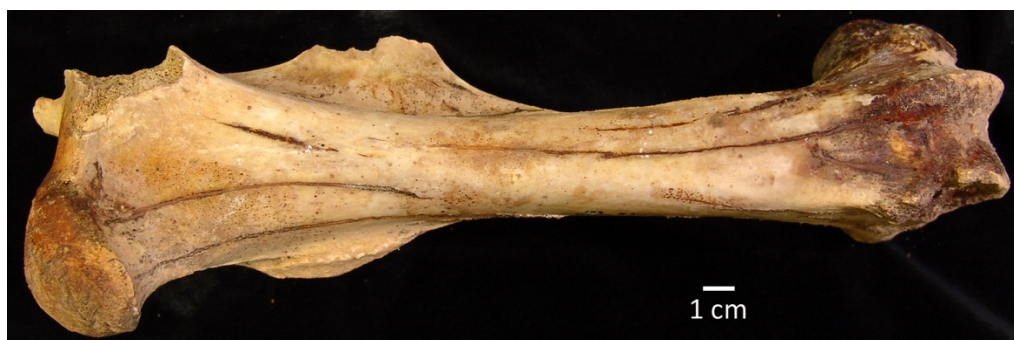

273

274 **Figure 2-Figure supplement 4.** An example femur of *H. francisci* from Gypsum Cave, Nevada  
275 (LACM(CIT)109/150708; JW277 / JK166), originally identified by Weinstock and colleagues  
276 (2005).

277

278 *Referred material.* On the basis of mitochondrial and nuclear genomic data, we assign the  
279 following material to *Haringtonhippus*: a cranium, femur, and MTIII (LACM(CIT); Nevada);  
280 three MTIIIs and three third metacarpals (MCIII) (KU; Wyoming); two radii, 12 MTIII, three  
281 MCIII, a metapodial, and a first phalanx (YG; Yukon Territory) (Figure 2-Figure supplements 1-  
282 4 and Supplementary file 1; (Weinstock *et al.*, 2005)). This material includes 5 males and at least  
283 6 females (Appendix 2, Supplementary table 6 and Supplementary file 3). We further assign  
284 MTIII specimens from Yukon Territory (n=13), Wyoming (n=57), and Nevada (n=4) to  
285 *Haringtonhippus* on the basis of morphometric analysis (Figure 2c and Supplementary file 4).  
286 We tentatively assign 19 NWSL equid metapodial specimens from Alaska (Guthrie, 2003) to  
287 *Haringtonhippus*, but note that morphometric and/or palaeogenomic analysis would be required  
288 to confirm this designation.

289  
290 *Geographic and temporal distribution.* *Haringtonhippus* is known only from the Pleistocene of  
291 North America (Figure 1). In addition to the middle Pleistocene holotype from Texas,  
292 *Haringtonhippus* is confidently known from the late Pleistocene of Yukon Territory (Klondike),  
293 Wyoming (Natural Trap Cave), and Nevada (Gypsum Cave, Mineral Hill Cave), and is  
294 tentatively registered as present in Alaska (Appendix 2, Supplementary file 1, and  
295 Supplementary table 4; (Vilstrup *et al.*, 2013; Weinstock *et al.*, 2005)).

296 To investigate the last appearance date (LAD) of *Haringtonhippus* in eastern Beringia,  
297 we obtained new radiocarbon dates from 17 Yukon Territory fossils (Appendix 1 and  
298 Supplementary file 1). This resulted in three statistically-indistinguishable radiocarbon dates of  
299 ~14.4 <sup>14</sup>C ka BP (derived from two independent laboratories) from a metacarpal bone (YG  
300 401.235) of *Haringtonhippus*, which represents this taxon's LAD in eastern Beringia

301 (Supplementary file 1). The LAD for North America as a whole is based on two dates of ~13.1  
302 <sup>14</sup>C ka BP from Gypsum Cave, Nevada (Supplementary file 1; (Weinstock *et al.*, 2005)).  
303  
304 *Mitogenomic diagnosis.* *Haringtonhippus* is the sister genus to *Equus* (equid crown group), with  
305 *Hippidion* being sister to the *Haringtonhippus-Equus* clade (Figure 1). *Haringtonhippus* can be  
306 differentiated from *Equus* and *Hippidion* by 178 synapomorphic positions in the mitochondrial  
307 genome, including four insertions and 174 substitutions (Appendix 2, Supplementary table 7 and  
308 Supplementary file 5). We caution that these synapomorphies are tentative and will likely be  
309 reduced in number as a greater diversity of mitochondrial genomes for extinct equids become  
310 available.

311  
312 *Morphological comparisons of third metatarsals.* We used morphometric analysis of  
313 caballine/stout-legged *Equus* and stilt-legged equids (hemionine/stilt-legged *Equus*,  
314 *Haringtonhippus*) MTIII to determine how confidently these groups can be distinguished  
315 (Figure 2c). Using logistic regression on principal components, we find a strong separation that  
316 can be correctly distinguished with 98.2% accuracy (Appendix 2 and Supplementary file 6).  
317 Hemionine/stilt-legged *Equus* MTIII occupy the same morphospace as *H. francisci* in our  
318 analysis, although given a larger sample size, it may be possible to discriminate *E. hemionus*  
319 from the remaining stilt-legged equids. We note that *Haringtonhippus* seems to exhibit a  
320 negative correlation between latitude and MTIII length, and that specimens from the same  
321 latitude occupy similar morphospace regardless of whether DNA- or morphological-based  
322 identification was used (Figure 2c and Supplementary file 4).

323

324 *Comments.* On the basis of morphology, we assign all referred material of *Haringtonhippus* to  
325 the single species *H. francisci* Hay 1915 (Appendix 2). Comparison between the cranial  
326 anatomical features of LACM(CIT) 109/156450 and TMM 34-2518 reveal some minor  
327 differences, which can likely be ascribed to intraspecific variation (Fig 2a and Appendix 2 and  
328 Figure 2-Figure supplement 1). Further, the MTIII of TMM 34-2518 is comparable to the MTIIIs  
329 ascribed to *Haringtonhippus* by palaeogenomic data, and is consistent with the observed  
330 latitudinally-correlated variation in MTIII length across *Haringtonhippus* (Figure 2c and  
331 Appendix 2).

332 This action is supported indirectly by molecular evidence, namely the lack of  
333 mitochondrial phylogeographic structure and the estimated time to most recent common ancestor  
334 (tMRCA) for sampled *Haringtonhippus*. The mitochondrial tree topology within  
335 *Haringtonhippus* does not exhibit phylogeographic structure (Figure 1-Figure supplement 1b),  
336 which is consistent with sampled *Haringtonhippus* mitochondrial genomes belonging to the  
337 same species. Using Bayesian time-tree analysis, we estimated a tMRCA for the sampled  
338 *Haringtonhippus* mitochondrial genomes of ~200-470 ka BP (Figure 1 and Supplementary table  
339 3 and Supplementary file 7). The MRCA of *Haringtonhippus* is therefore more recent than that  
340 of other extant equid species (such as *E. asinus* and *E. quagga*, which have a combined 95%  
341 HPD range: 410-1030 ka BP; Figure 1 and Supplementary table 3 and Supplementary file 7).  
342 Although the middle Pleistocene holotype TMM 34-2518 (~125-780 ka BP) may predate our  
343 *Haringtonhippus* mitochondrial tMRCA, this sample has no direct date and the range of possible  
344 ages falls within the tMRCA range of other extant equid species. We therefore cannot reject the  
345 hypothesis of its conspecificity with *Haringtonhippus*, as defined palaeogenomically. We  
346 attempted, but were unable, to recover either collagen or genomic data from TMM 34-2518

347 (Appendix 2), consistent with the taphonomic, stratigraphic, and geographic context of this fossil  
348 (Hay, 1915; Lundelius & Stevens, 1970). Altogether, the molecular evidence is consistent with  
349 the assignment of *H. francisci* as the type and only species of *Haringtonhippus*.

350

## 351 **Discussion**

### 352 **Reconciling the genomic and fossil records of Plio-Pleistocene equid evolution**

353 The placement of *Haringtonhippus* as sister taxon to *Equus* is less congruent with the fossil  
354 record than previous hypotheses, which have placed *Haringtonhippus* within *Equus*, as sister to  
355 either hemionines or caballine horses (Figure 1). The earliest NWSL and caballine equids appear  
356 in the fossil record at ~2-3 and ~1.9-0.7 Ma (Eisenmann *et al.*, 2008; Forsten, 1992),  
357 respectively, whereas our divergence estimates suggest that these lineages appeared at 4.1-5.8  
358 and 3.8-4.5 Ma, most likely in North America. This could be due to incompleteness of the fossil  
359 record or a discordance between the timing of species divergence and the evolution of diagnostic  
360 anatomical characteristics (Forsten, 1992). Although there will likely always be problems  
361 associated with the completeness of the fossil record, the well known late Miocene and Pliocene  
362 fossil records of New World equids would suggest that this discordance is not due to missing  
363 fossils.

364 Pliocene *Equus* generally exhibits a primitive ('plesippine' in North America, 'stenonid'  
365 in the Old World) morphology that presages living zebras and asses (Forsten, 1988, 1992), with  
366 more derived caballine (stout-legged) and hemionine (stilt-legged) forms evolving in the early  
367 Pleistocene. The stilt-legged morphology appears to have evolved independently at least once in  
368 each of the Old and New Worlds, yielding the Asiatic wild asses and *Haringtonhippus*,  
369 respectively. We include the middle-late Pleistocene Eurasian *E. hydruntinus* within the Asiatic  
370 wild asses (following (Bennett *et al.*, 2017; Burke, Eisenmann, & Ambler, 2003; Orlando *et al.*,  
371 2006)), and note that the Old World sussemione *E. ovodovi* may represent another instance of  
372 independent stilt-legged origin, but its relation to Asiatic wild asses and other non-caballine  
373 *Equus* is currently unresolved (as depicted in (Der Sarkissian *et al.*, 2015; Orlando *et al.*, 2009;

374 Vilstrup *et al.*, 2013) and Figure 1). As such, it is plausible that the more primitive Pleistocene  
375 morphological states, including *Hippidion*-like, only survived past the early to middle  
376 Pleistocene at lower latitudes (South America, Africa; Figure 1), and that the derived hemionine  
377 and caballine morphologies evolved from, and replaced, primitive ancestors in higher latitude  
378 North America and Eurasia during the Pleistocene, perhaps as adaptations to the extreme  
379 ecological pressures perpetuated by the advance and retreat of continental ice sheets in response  
380 to rapid climate oscillations during glacial cycles (Forsten, 1992, 1996). We note that this high  
381 latitude replacement model is consistent with the turnover observed in the Pleistocene equid  
382 regional fossil records of North America (Azzaroli, 1992; Azzaroli & Voorhies, 1993) and  
383 Eurasia (Forsten, 1988, 1992, 1996). By contrast, in South America *Hippidion* co-existed with  
384 caballine horses until they both succumbed to extinction with much of the New World  
385 megafauna near the end of the Pleistocene (Forsten, 1996; Koch & Barnosky, 2006; O’Dea *et al.*,  
386 2016). This model helps explain the discordance between the timings of the appearance of the  
387 caballine and hemionine morphologies in the fossil record and the divergence of lineages leading  
388 to these forms as estimated from palaeogenomic data. The model predicts that some previously  
389 described North American Pliocene and early Pleistocene primitive *Equus* species (e.g., *E.*  
390 *simplicidens*, *E. idahoensis*; (Azzaroli & Voorhies, 1993)), or specimens thereof, may be  
391 ancestral to extant *Equus* and/or late Pleistocene *Haringtonhippus*.

392

### 393 **Temporal and geographic range overlap of Pleistocene equids in North America**

394 Three new radiocarbon dates of ~14.4 <sup>14</sup>C ka BP from a Yukon *Haringtonhippus* fossil greatly  
395 extends the known temporal range of this genus in eastern Beringia. This result demonstrates,  
396 contrary to its previous LAD of 31,400±1200 <sup>14</sup>C years ago (AA 26780; (Guthrie, 2003)), that



397 *Haringtonhippus* survived throughout the last glacial maximum in eastern Beringia (Clark *et al.*,  
398 2009) and may have come into contact with humans near the end of the Pleistocene (Goebel,  
399 Waters, & O'Rourke, 2008; Guthrie, 2006). These data suggest that populations of stilt-legged  
400 *Haringtonhippus* and stout-legged caballine *Equus* were sympatric, both north and south of the  
401 continental ice sheets, through the late Pleistocene and became extinct at roughly the same time.  
402 The near synchronous extinction of both horse groups across their entire range in North America  
403 suggests that similar causal mechanisms may have led each to their demise.

404         The sympatric nature of these equids raises questions of whether they managed to live  
405 within the same community without hybridizing or competing for resources. Extant members of  
406 the genus *Equus* vary considerably in the sequence of Prdm9, a gene involved in the speciation  
407 process, and chromosome number (karyotype) (Ryder, Epel, & Benirschke, 1978; Steiner &  
408 Ryder, 2013), and extant caballine and non-caballine *Equus* rarely produce fertile offspring  
409 (Allen & Short, 1997; Steiner & Ryder, 2013). It is unlikely, therefore, that the more deeply  
410 diverged *Haringtonhippus* and caballine *Equus* would have been able to hybridize. Future  
411 analysis of high coverage nuclear genomes, ideally including an outgroup such as *Hippidion*,  
412 will make it possible to test for admixture that may have occurred soon after the lineages leading  
413 to *Haringtonhippus* and *Equus* diverged, as occurred between the early caballine and non-  
414 caballine *Equus* lineages (Jónsson *et al.*, 2014). It may also be possible to use isotopic and/or  
415 tooth mesowear analyses to assess the potential of resource partitioning between  
416 *Haringtonhippus* and caballine *Equus* in the New World.

417

418 **Fossil systematics in the palaeogenomics and proteomics era: concluding remarks**

419 Fossils of NWSL equids have been known for more than a century, but until the present study  
420 their systematic position within Plio-Pleistocene Equidae was poorly characterized. This was not  
421 because of a lack of interest on the part of earlier workers, whose detailed anatomical studies  
422 strongly indicated that what we now call *Haringtonhippus* was related to Asiatic wild asses, such  
423 as Tibetan khulan and Persian onagers, rather than to caballine horses (Eisenmann *et al.*, 2008;  
424 Guthrie, 2003; Scott, 2004; Skinner & Hibbard, 1972). That the cues of morphology have turned  
425 out to be misleading in this case underlines a recurrent problem in systematic biology, which is  
426 how best to discriminate authentic relationships within groups, such as Neogene equids, that  
427 were prone to rampant convergence. The solution we adopted here was to utilize both  
428 palaeogenomic and morphometric information in reframing the position of *Haringtonhippus*,  
429 which now clearly emerges as the closest known outgroup to all living *Equus*.

430 Our success in this regard demonstrates that an approach which incorporates phenomics  
431 with molecular methods (palaeogenomic as well as palaeoproteomic, e.g. (Welker *et al.*, 2015))  
432 is likely to offer a means for securely detecting relationships within speciose groups that are  
433 highly diverse ecomorphologically. All methods have their limits, with taphonomic degradation  
434 being the critical one for molecular approaches. However, proteins may persist significantly  
435 longer than ancient DNA (e.g. (Rybczynski *et al.*, 2013)), and collagen proteomics may come to  
436 play a key role in characterizing affinities, as well as the reality, of several proposed Neogene  
437 equine taxa (e.g. *Dinohippus*, *Pliohippus*, *Protohippus*, *Calippus*, and *Astrohippus*; (Macfadden,  
438 1998)) whose distinctiveness and relationships are far from settled (Azzaroli & Voorhies, 1993;  
439 Forsten, 1992). A reciprocally informative approach like the one taken here holds much promise  
440 for lessening the amount of systematic noise, due to oversplitting, that hampers our

441 understanding of the evolutionary biology of other major late Pleistocene megafaunal groups  
442 such as bison and mammoths (Enk *et al.*, 2016; Froese *et al.*, 2017). This approach is clearly  
443 capable of providing new insights into just how extensive megafaunal losses were at the end of  
444 the Pleistocene, in what might be justifiably called the opening act of the Sixth Mass Extinction  
445 in North America.  
446

## 447 **Materials and Methods**

448 We provide an overview of methods here; full details can be found in Appendix 1.

449

450 **Sample collection and radiocarbon dating.** We recovered Yukon fossil material (17  
451 *Haringtonhippus francisci*, two *Equus cf. scotti*, and two *E. lambei*; Supplementary file 1) from  
452 active placer mines in the Klondike goldfields near Dawson City. We further sampled seven *H.*  
453 *francisci* fossils from the contiguous USA that are housed in collections at the University of  
454 Kansas Biodiversity Institute (KU; n=4), Los Angeles County Museum of Natural History  
455 (LACM(CIT); n=2), and the Texas Memorial Museum (TMM; n=1). We radiocarbon dated the  
456 Klondike fossils and the *H. francisci* cranium from the LACM(CIT) (Supplementary file 1).

457

458 **Morphometric analysis of third metatarsals.** For morphometric analysis, we took  
459 measurements of third metatarsals (MTIII) and other elements. We used a reduced data set of  
460 four MTIII variables for principal components analysis and performed logistic regression on the  
461 first three principal components, computed in R (R Development Core Team, 2008)  
462 (Supplementary file 6).

463

464 **DNA extraction, library preparation, target enrichment, and sequencing.** We conducted all  
465 molecular biology methods prior to indexing PCR in the dedicated palaeogenomics laboratory  
466 facilities at either the UC Santa Cruz or Pennsylvania State University. We extracted DNA from  
467 between 100 and 250 mg of bone powder following either (Rohland, Siedel, & Hofreiter, 2010)  
468 or (Dabney, *et al.*, 2013). We then converted DNA extracts to libraries following the Meyer and  
469 Kircher protocol (Meyer & Kircher, 2010), as modified by (Heintzman *et al.*, 2015) or the PSU

470 method of (Vilstrup *et al.*, 2013). We enriched libraries for equid mitochondrial DNA. We then  
471 sequenced all enriched libraries and unenriched libraries from 17 samples using Illumina  
472 platforms.

473  
474 **Mitochondrial genome reconstruction and analysis.** We prepared raw sequence data for  
475 alignment and mapped the filtered reads to the horse reference mitochondrial genome (Genbank:  
476 NC\_001640.1) and a *H. francisci* reference mtDNA genome (Genbank: KT168321), resulting in  
477 mitogenomic coverage ranging from 5.8× to 110.7× (Supplementary file 1). We were unable to  
478 recover equid mtDNA from TMM 34-2518 (the *francisci* holotype) using this approach  
479 (Appendix 2). We supplemented our mtDNA genome sequences with 38 previously published  
480 complete equid mtDNA genomes. We constructed six alignment data sets and selected models of  
481 molecular evolution for the analyses described below (Supplementary table 8, and  
482 Supplementary files 1 and 8).

483 We tested the phylogenetic position of the NWSL equids (= *H. francisci*) using mtDNA  
484 data sets 1-3 and applying Bayesian (Ronquist *et al.*, 2012) and Maximum Likelihood (ML;  
485 (Stamatakis, 2014)) analyses. We varied the outgroup, the inclusion or exclusion of the fast-  
486 evolving partitions, and the inclusion or exclusion of *Hippidion* sequences. Due to the lack of a  
487 globally supported topology across the Bayesian and ML phylogenetic analyses, we used an  
488 Evolutionary Placement Algorithm (EPA; (Berger *et al.*, 2011)) to determine the *a posteriori*  
489 likelihood of phylogenetic placements for candidate equid outgroups using mtDNA data set four.  
490 We also used the same approach to assess the placement of previously published equid  
491 sequences (Appendix 2). To infer divergence times between the four major equid groups  
492 (*Hippidion*, NWSL equids, caballine *Equus*, and non-caballine *Equus*), we ran Bayesian timetree

493 analyses (Drummond *et al.* 2012) using mtDNA data set five. We varied these analyses by  
494 including or excluding fast-evolving partitions, constrained the root height or not, and including  
495 or excluding the *E. ovodovi* sequence.

496 To facilitate future identification of equid mtDNA sequences, we constructed, using data  
497 set six, a list of putative synapomorphic base states, including indels and substitutions, that  
498 define the genera *Hippidion*, *Haringtonhippus*, and *Equus* at sites across the mtDNA genome.

499

500 **Phylogenetic inference, divergence date estimation, and sex determination from nuclear**  
501 **genomes.** To test whether our mtDNA genome-based phylogenetic hypothesis truly reflects the  
502 species tree, we compared the nuclear genomes of a horse (EquCab2), donkey (Orlando *et al.*,  
503 2013), and the shotgun sequence data from 17 of our NWSL equid samples (Appendix 1,  
504 Appendix 1-figure 1 and Supplementary files 1-2). We applied four successive approaches,  
505 which controlled for reference genome and DNA fragment length biases (Appendix 1).

506 We estimated the divergence between the NWSL equids and *Equus* (horse and donkey)  
507 by fitting the branch length, or relative private transversion frequency, ratio between  
508 horse/donkey and NWSL equids into a simple phylogenetic scenario (Figure 1-Figure  
509 supplement 3). We then multiplied the NWSL equid branch length by a previous horse-donkey  
510 divergence estimate (4.0-4.5 Ma; (Orlando *et al.*, 2013)) to give the estimated NWSL equid-  
511 *Equus* divergence date, following (Heintzman *et al.*, 2015) and assuming a strict genome-wide  
512 molecular clock (Figure 1-Figure supplement 3).

513 We determined the sex of the 17 NWSL equid samples by comparing the relative  
514 mapping frequency of the autosomes to the X chromosome.

515

516 **DNA damage analysis.** We assessed the prevalence of mitochondrial and nuclear DNA damage  
517 in a subset of the equid samples using mapDamage (Jónsson *et al.*, 2013).

518

519 **Data availability.** Repository details and associated metadata for curated samples can be found  
520 in Supplementary file 1. MTIII and other element measurement data are in Supplementary file 4,  
521 and the Rscript used for morphometric analysis is Supplementary file 6. MtDNA genome  
522 sequences have been deposited in Genbank under accessions KT168317-KT168336, MF134655-  
523 MF134663, and an updated version of JX312727. All mtDNA genome alignments and associated  
524 XML and tree files are in Supplementary files 7-9. Raw shotgun sequence data used for the  
525 nuclear genomic analyses have been deposited in the Short Read Archive (Bioproject:  
526 PRJNA384940; SRA accessions: SRR5556842-SRR5556858).

527

## 528 **Appendix 1 Supplementary methods**

### 529 **1.1 Yukon sample context and identification**

530 Pleistocene vertebrate fossils are commonly recovered at these localities, in the absence of  
531 stratigraphic context, as miners are removing frozen sediments to access underlying gold bearing  
532 gravel (Froese *et al.*, 2009; Harington, 2011). We recovered *H. francisci* fossils along with other  
533 typical late Pleistocene (Rancholabrean) taxa, including caballine horses (*Equus* sp.), woolly  
534 mammoth (*Mammuthus primigenius*), steppe bison (*Bison priscus*), and caribou (*Rangifer*  
535 *tarandus*), which are consistent with our age estimates based on radiocarbon dating  
536 (Supplementary file 1). All Yukon fossil material consisted of limb bones that were  
537 taxonomically assigned based on their slenderness and are housed in the collections of the Yukon  
538 Government (YG).

539

### 540 **1.2 Radiocarbon dating**

541 We subsampled fossil specimens using handheld, rotating cutting tools and submitted them to  
542 either the KECK Accelerator Mass Spectrometry (AMS) Laboratory at the University of  
543 California (UC), Irvine (UCIAMS) and/or the Center for AMS (CAMS) at the Lawrence  
544 Livermore National Laboratory. We extracted collagen from the fossil subsamples using  
545 ultrafiltration (Beaumont, Beverly, Southon, & Taylor, 2010), which was used for AMS  
546 radiocarbon dating. We were unable to recover collagen from TMM 34-2518 (*francisci*  
547 holotype), consistent with the probable middle Pleistocene age of this specimen (Lundelius &  
548 Stevens, 1970). We recovered finite radiocarbon dates from all other fossils, with the exception  
549 of the two *Equus* cf. *scotti* specimens. We calibrated AMS radiocarbon dates using the IntCal13



550 curve (Reimer *et al.*, 2013) in OxCal v4.2 (<https://c14.arch.ox.ac.uk/oxcal/OxCal.html>) and  
551 report median calibrated dates in Supplementary file 1.

552

### 553 **1.3 Morphometric analysis of third metatarsals**

554 Third metatarsal (MTIII) and other elemental measurements were either taken by G.D.Z. or E.S.  
555 or from the literature (Supplementary file 4). For morphometric analysis, we focused exclusively  
556 on MTIIIs, which exhibit notable differences in slenderness among equid groups (Figure 2-  
557 Figure supplement 2a; (Weinstock *et al.*, 2005)). Starting with a data set of 10 variables  
558 (following (Eisenmann, Alberdi, deGiuli, & Staesche, 1988)), we compared the loadings of all  
559 variables in principal components space in order to remove redundant measurements. This  
560 reduced the data set to four variables (GL: greatest length, Pb: proximal breadth, Mb: midshaft  
561 breadth, and DABm: distal articular breadth at midline). We visualized the reduced variables  
562 using principal components analysis, computed in R (Supplementary file 5; (R Development  
563 Core Team, 2008)), and performed logistic regression on the first three principal components to  
564 test whether MTIII morphology can distinguish stilt-legged (hemionine *Equus* and *H. francisci*,  
565 n=105) from stout-legged (caballine *Equus*, n=187) equid specimens.

566

### 567 **1.4 Target enrichment and sequencing**

568 We enriched libraries for equid mitochondrial DNA following the MyBaits v2 protocol  
569 (MYcroarray, Ann Arbor, MI), with RNA bait molecules constructed from the horse reference  
570 mitochondrial genome sequence (NC\_001640.1). We then sequenced the enriched libraries for  
571 2× 150 cycles on the Illumina HiSeq-2000 platform at UC Berkeley or 2× 75 cycles on the  
572 MiSeq platform at UC Santa Cruz, following the manufacturer's instructions. We produced data

573 for the nuclear genomic analyses by shotgun sequencing 17 of the unenriched libraries for 2× 75  
574 cycles on the MiSeq to produce ~1.1-6.4 million reads per library (Supplementary file 2).

575

### 576 **1.5 Mitochondrial genome reconstruction**

577 We initially reconstructed the mitochondrial genome for *H. francisci* specimen YG 404.663  
578 (PH047). For sequence data enriched for the mitochondrial genome, we trimmed adapter  
579 sequences, merged paired-end reads (with a minimum overlap of 15 base pairs (bp) required),  
580 and removed merged reads shorter than 25 bp, using SeqPrep  
581 (<https://github.com/jstjohn/SeqPrep>). We then mapped the merged and remaining unmerged  
582 reads to the horse reference mitochondrial genome sequence using the Burrows-Wheeler Aligner  
583 aln (BWA-aln v0.7.5; (Li & Durbin, 2010)), with ancient parameters (-l 1024; (Schubert *et al.*,  
584 2012)). We removed reads with a mapping quality less than 20 and collapsed duplicated reads to  
585 a single sequence using SAMtools v0.1.19 rmdup (Li *et al.*, 2009). We called consensus  
586 sequences using Geneious v8.1.7 (Biomatters, <http://www.geneious.com>; (Kearse *et al.*, 2012)).  
587 We then re-mapped the reads to the same reference mitochondrial genome using the iterative  
588 assembler, MIA (Briggs *et al.*, 2009). Consensus sequences from both alignment methods  
589 required each base position to be covered a minimum of three times, with a minimum base  
590 agreement of 67%. The two consensus sequences were then combined to produce a final  
591 consensus sequence for YG 404.663 (Genbank: KT168321), which we used as the *H. francisci*  
592 reference mitochondrial genome sequence.

593 For the remaining newly analyzed 21 *H. francisci*, two *E. cf. scotti*, and two *E. lambei*  
594 samples, we merged and removed reads as described above. We then separately mapped the  
595 retained reads to the horse and *H. francisci* mitochondrial reference genome sequences using

596 MIA. Consensus sequences from MIA analyses were called as described above. The two  
597 consensus sequences were then combined to produce a final consensus sequence for each  
598 sample, with coverage ranging from 5.8× to 110.7× (Supplementary file 1). We also  
599 reconstructed the mitochondrial genomes for four previously published samples: YG 401.268,  
600 LACM(CIT) 109/150807, KU 62158, and KU 62055 (Supplementary file 1; (Vilstrup *et al.*,  
601 2013; Weinstock *et al.*, 2005)).

602

### 603 **1.6 Mitochondrial genome alignments**

604 We supplemented our 30 new mitochondrial genome sequences with 38 previously published  
605 complete equid mitochondrial genomes, which included all extant *Equus* species, and extinct  
606 *Hippidion*, *E. ovodovi*, and *E. cf. scotti* ('equids'). We constructed six alignment data sets for the  
607 mitochondrial genome analyses: (1) equids and White rhinoceros (*Ceratotherium simum*;  
608 NC\_001808) (n=69); (2) equids and Malayan tapir (*Tapirus indicus*; NC\_023838) (n=69); (3)  
609 equids, six rhinos, two tapirs, and dog (*Canis lupus familiaris*; NC\_002008) (n=77); (4) equids,  
610 six rhinos, two tapirs, ten published equid short fragments, and two published NWSL equid  
611 mitochondrial genome sequences (n=88); (5) a reduced equid data set (n=32); and (6) a full  
612 equid data set (n=68) (Supplementary file 8). For data sets three and four, we selected one  
613 representative from all rhino and tapir species for which full mitochondrial genome data are  
614 publicly available (Supplementary file 1).

615 For all six data sets, we first created an alignment using muscle (v3.8.31; (15)). We then  
616 manually scrutinized alignments for errors and removed a 253 bp variable number of tandem  
617 repeats (VNTR) part of the control region, corresponding to positions 16121-16373 of the horse  
618 reference mitochondrial genome. We partitioned the alignments into six partitions (three codon

619 positions, ribosomal-RNAs, transfer-RNAs, and control region), using the annotated horse  
620 reference mitochondrial genome in Geneious, following (Heintzman *et al.*, 2015). We excluded  
621 the fast-evolving control region alignment for data set three, which included the highly-diverged  
622 dog sequence. For each partition, we selected models of molecular evolution using the Bayesian  
623 information criterion in jModelTest (v2.1.6; (Darriba, Taboada, Doallo, & Posada, 2012))  
624 (Supplementary table 8).

625

### 626 **1.7 Phylogenetic analysis of mitochondrial genomes**

627 To test the phylogenetic position of the NWSL equids, we conducted Bayesian and maximum  
628 likelihood (ML) phylogenetic analyses of data sets one, two, and three, under the partitioning  
629 scheme and selected models of molecular evolution described above. For outgroup, we selected:  
630 White rhinoceros (data set one), Malayan tapir (data set two), or dog (data set three). For each of  
631 the data sets, we varied the analyses based on (a) inclusion or exclusion of the fast-evolving  
632 partitions (third codon positions and control region, where appropriate) and (b) inclusion or  
633 exclusion of the *Hippidion* sequences. We ran Bayesian analyses in MrBayes (v3.2.6, (Ronquist  
634 *et al.*, 2012)) for two parallel runs of 10 million generations, sampling every 1,000, with the first  
635 25% discarded as burn-in. We conducted ML analyses in RAxML (v8.2.4, (Stamatakis, 2014)),  
636 using the GTRGAMMAI model across all partitions, and selected the best of three trees. We  
637 evaluated branch support with both Bayesian posterior probability scores from MrBayes and 500  
638 ML bootstrap replicates in RAxML.

639

### 640 **1.8 Placement of outgroups and published sequences *a posteriori***

641 We used the Evolutionary Placement Algorithm (EPA) in RAxML to determine the *a posteriori*  
642 likelihood of phylogenetic placements for eight candidate equid outgroups (two tapirs, six  
643 rhinos) relative to the four well supported major equid groups (*Hippidion*, NWSL equids,  
644 caballine *Equus*, non-caballine *Equus*). We first constructed an unrooted reference tree  
645 consisting only of the equids from data set four in RAxML. We then analyzed the placements of  
646 the eight outgroups and retaining all placements up to a cumulative likelihood threshold of 0.99.  
647 We used the same approach to assess the placement of 12 previously published equid sequences  
648 derived from four NWSL equids (Vilstrup *et al.*, 2013; Weinstock *et al.*, 2005), five *Hippidion*  
649 *devillei* (Orlando *et al.*, 2009), and three *E. ovodovi* (Orlando *et al.*, 2009) (Supplementary table  
650 4).

651

### 652 **1.9 Divergence date estimation from mitochondrial genomes**

653 To further investigate the topology of the four major equid groups, and to infer divergence times  
654 between them, we ran Bayesian timetree analyses in BEAST (v1.8.4; (Drummond *et al.*, 2012)).  
655 Unlike the previous analyses, BEAST can resolve branching order in the absence of an outgroup,  
656 by using branch length and molecular clock methods. For BEAST analyses, we used data set  
657 five. We did not enforce monophyly. Where available, we used radiocarbon dates to tip date  
658 ancient samples. For two samples without available radiocarbon dates, we sampled the ages of  
659 tips. For the *E. ovodovi* sample (mtDNA genome: NC\_018783), which was found in a cave that  
660 has been stratigraphically dated as late Pleistocene and includes other *E. ovodovi* remains have  
661 been dated to ~45-50 ka BP (Eisenmann & Sergej, 2011; Orlando *et al.*, 2009), we used the  
662 following lognormal prior (mean:  $4.5 \times 10^4$ , log(stdev): 0.766, offset:  $1.17 \times 10^4$ ) to ensure that  
663 95% of the prior fell within the late Pleistocene (11.7-130 ka BP). For the *E. cf. scotti*

664 mitochondrial genome (KT757763), we used a normal prior (mean:  $6.7 \times 10^5$ , stdev:  $5.64 \times 10^4$ ) to  
665 ensure that 95% of the prior fell within the proposed age range of this specimen (560-780 ka BP;  
666 (Orlando *et al.*, 2013)). We further calibrated the tree using an age of 4-4.5 Ma for the root of  
667 crown group *Equus* (normal prior, mean  $4.25 \times 10^6$ , stdev:  $1.5 \times 10^5$ ) (Orlando *et al.*, 2013). To  
668 assess the impact of variables on the topology and divergence times, we either (a) included or  
669 excluded the fast-evolving partitions, (b) constrained the root height (lognormal prior: mean  
670  $1 \times 10^7$ , stdev: 1.0) or not, and (c) included or excluded the *E. ovodovi* sequence, which was not  
671 directly dated. We used the models of molecular evolution estimated by jModeltest  
672 (Supplementary table 8). We estimated the substitution and clock parameters for each partition,  
673 and estimated a single tree using all partitions. We implemented the birth-death serially sampled  
674 (BDSS) tree prior. We ran two analyses for each variable combination. In each analysis, we ran  
675 the MCMC chain for 100 million generations, sampling trees and parameters every 10,000, and  
676 discarding the first 10% as burn-in. We checked log files for convergence in Tracer (v1.6;  
677 <http://tree.bio.ed.ac.uk/software/tracer/>). We combined trees from the two runs for each variable  
678 combination in LogCombiner (v1.8.4) and then calculated the maximum clade credibility (MCC)  
679 tree in TreeAnnotator (v1.8.4). We report divergence dates as 95% highest posterior probability  
680 credibility intervals of node heights.

681

### 682 **1.10 Mitochondrial synapomorphy analysis**

683 We first divided data set six, which consists of all available and complete equid mitogenomic  
684 sequences, into three data sets based on the genera *Hippidion*, *Haringtonhippus*, and *Equus*. For  
685 each of the three genus-specific alignments, we created a strict consensus sequence, whereby  
686 sites were only called if there was 100% sequence agreement, whilst including gaps and

687 excluding ambiguous sites. We then compared the three genus-specific consensus sequences to  
688 determine sites where one genus exhibited a base state that is different to the other two genera,  
689 or, at five sites, where each genus has its own base state (Supplementary file 5). In this analysis,  
690 we did not make any inference regarding the ancestral state for the identified synapomorphic  
691 base states. We identified 391 putative mtDNA genome synapomorphies for *Hippidion*, 178 for  
692 *Haringtonhippus*, and 75 for *Equus* (Supplementary file 5).

693

### 694 **1.11 Phylogenetic inference from nuclear genomes**

695 We compared the genomes of a horse (*E. caballus*; EquCab2; GCA\_000002305.1) and donkey  
696 (*E. asinus*; Willy, 12.4×; <http://geogenetics.ku.dk/publications/middle-pleistocene-omics>;  
697 (Orlando *et al.*, 2013)) with shotgun sequence data from 17 of our NWSL equid samples  
698 (Supplementary files 1-2). We merged paired-end reads using SeqPrep as described above,  
699 except that we removed merged reads shorter than 30 bp. We further removed merged and  
700 remaining unmerged reads that had low sequence complexity, defined as a DUST score >7, using  
701 PRINSEQ-lite v0.20.4 (Schmieder & Edwards, 2011). We used four successive approaches to  
702 minimize the impact of mapping bias introduced from ancient DNA fragment length variation  
703 and reference genome choice.

704 We first followed a modified version of the approach outlined in (Heintzman *et al.*,  
705 2015). We mapped the donkey genome to the horse genome by computationally dividing the  
706 donkey genome into 150 bp ‘pseudo-reads’ tiled every 75 bp, and aligned these pseudo-reads  
707 using Bowtie2-local v2.1.0 (Langmead & Salzberg, 2012) while allowing one seed mismatch  
708 and a maximum mismatch penalty of four to better account for ancient DNA specific damage  
709 (Appendix 1-figure 1, steps 1-3). We then mapped the filtered shotgun data from each of the

710 NWSL equid samples to the horse genome using Bowtie2-local with the settings described  
711 above, and removed PCR duplicated reads and those with a mapping quality score of <30 in  
712 SAMtools. We called a pseudo-haploidized sequence for the donkey and NWSL equid  
713 alignments, by randomly picking a base with a base quality score  $\geq 60$  at each position, using  
714 SAMtools mpileup. We masked positions that had a coverage not equal to  $2\times$  (donkey) or  $1\times$   
715 (NWSL equid), and those located on scaffolds shorter than 100 kb (Appendix 1-figure 1, step 4).  
716 As the horse, donkey, and NWSL equid genome sequences were all based on the horse genome  
717 coordinates, we compared the relative transversion frequency between the donkey or NWSL  
718 equids and the horse using custom scripts. We restricted our analyses to transversions to avoid  
719 the impacts of ancient DNA damage, which can manifest as erroneous transitions from the  
720 deamination of cytosine (e.g. Appendix 2-Figures 1-2) (Dabney, Meyer, & Pääbo, 2013). We  
721 repeated this analysis, but with the horse and NWSL equids mapped to the donkey genome (the  
722 donkey genome coordinate framework).  
723



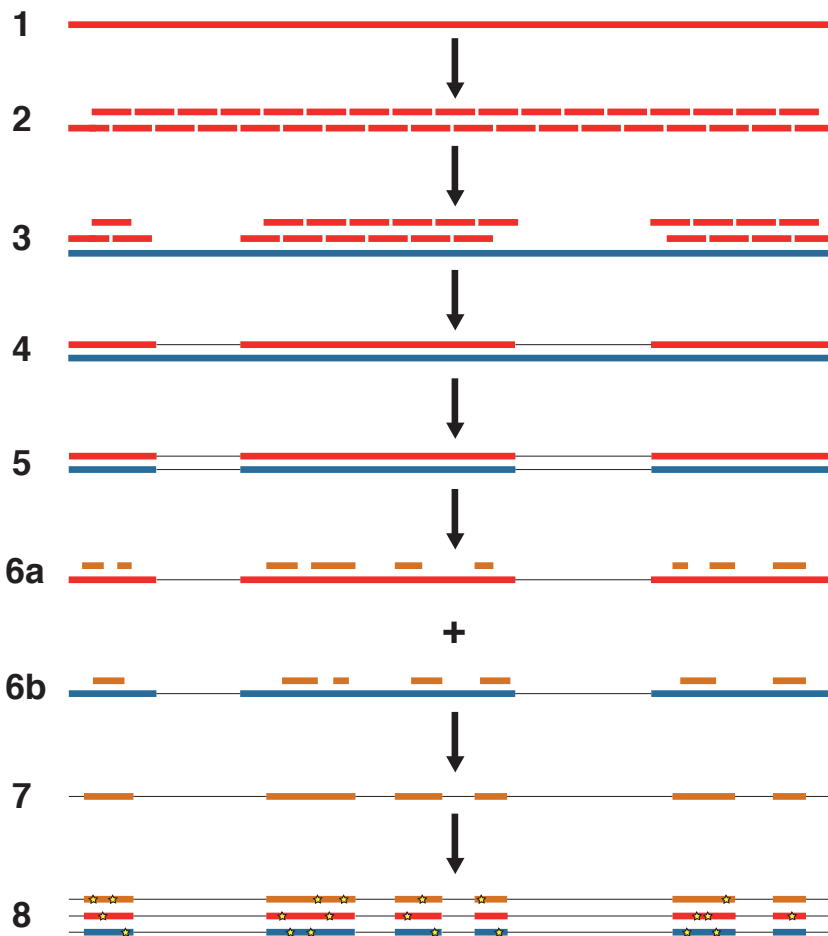

724

725 **Appendix 1-Figure 1.** An overview of the nuclear genome analysis pipeline. A first reference  
726 genome sequence (red; step 1) is divided into 150 bp pseudo-reads, tiled every 75 bp for exactly  
727  $2\times$  genomic coverage (step 2). These pseudo-reads are then mapped to a second reference  
728 genome (blue; step 3), and a consensus sequence of the mapped pseudo-reads is called (step 4).  
729 Regions of the second reference genome that are not covered by the pseudo-reads are masked  
730 (step 5). For each NWSL equid sample, reads (orange) are mapped independently to the first  
731 reference consensus sequence (step 6a) and masked second reference genome (step 6b).  
732 Alignments from steps 6a and 6b are then merged (step 7). For alignment coordinates that have  
733 base calls for the first reference, second reference, and NWSL equid sample genomes, the  
734 relative frequencies of private transversion substitutions (yellow stars) for each genome are

735 calculated (step 8). The co-ordinates from the second reference genome (blue) are used for each  
736 analysis.

737

738 For the second approach and using the horse genome coordinate framework, we next  
739 masked sites in the horse reference genome that were not covered by donkey reads at a depth of  
740 2×. This resulted in the horse genome and donkey consensus sequence being masked at the same  
741 positions (Appendix 1-figure 1, step 5). We then separately mapped the filtered NWSL equid  
742 shotgun data to scaffolds longer than 100 kb for the masked horse genome and donkey consensus  
743 sequence (Appendix 1-figure 1, step 6), called NWSL equid consensus sequences, and calculated  
744 relative transversion frequencies as described above. This analysis was repeated using the  
745 donkey genome coordinate framework.

746 Next, for each genome coordinate framework, we combined the two alignments for each  
747 NWSL equid sample from approach two to create a union of reads mappable to both the masked  
748 coordinate genome and alternate genome consensus sequence (Appendix 1-figure 1, step 7). If a  
749 NWSL equid read mapped to different coordinates between the two references, we selected the  
750 alignment with the higher map quality score and randomly selected between mappings of equal  
751 quality. We then called NWSL equid consensus sequences as above. As this third approach  
752 allowed for simultaneous comparison of the horse, donkey, and NWSL equid sequences, we  
753 calculated relative private transversion frequencies for each sequence, at sites where all three  
754 sequences had a base call, using tri-aln-report ([https://github.com/Paleogenomics/Chrom-](https://github.com/Paleogenomics/Chrom-Compare)  
755 [Compare](https://github.com/Paleogenomics/Chrom-Compare)) (Appendix 1-figure 1, step 8).

756 Finally, as a fourth approach and for both genome coordinate frameworks, we repeated  
757 approach three with the exception that we divided the NWSL alignments by mapped read length.

758 We split the alignments into 10 bp read bins ranging from 30-39 to 120-129 bp, and discarded  
759 longer reads and paired-end reads that were unmerged by SeqPrep. We called consensus  
760 sequences and calculated relative private transversion frequencies for each sequence as described  
761 above. We only used relative private transversion frequencies from the 90-99 to 120-129 bp bins  
762 for divergence date estimates (Appendix 2).

763

### 764 **1.12 Sex determination from nuclear genomes**

765 We used the alignments of the 17 NWSL equids to the horse genome, from approach one  
766 described above, to infer the probable sex of these individuals. For this, we determined the  
767 number of reads mapped to each chromosome using SAMtools idxstats. For each chromosome,  
768 we then calculated the relative mapping frequency by dividing the number of mapped reads by  
769 the length of the chromosome. We then compared the relative mapping frequency between the  
770 autosomes and X-chromosome. As males and females are expected to have one and two copies  
771 of the X chromosome, respectively, and two copies of every autosome, we inferred a male if the  
772 ratio between the autosomes and X-chromosome was 0.45-0.55 and a female if the ratio were  
773 0.9-1.1.

774

### 775 **1.13 DNA damage analysis**

776 For a subset of nine samples, we realigned the filtered sequence data from the libraries enriched  
777 for equid mitochondrial DNA to either the *H. francisci* (for *H. francisci* samples) or horse (for *E.*  
778 *lambei* and *E. cf. scotti* samples) reference mitochondrial genome sequences using BWA-aln as  
779 described above. We also realigned the filtered unenriched sequence data to the horse reference

780 genome (EquCab2) for a subset of six samples using the same approach. We then analyzed  
781 patterns of DNA damage in mapDamage v2.0.5 (Jónsson *et al.*, 2013).

782

## 783 **Appendix 2 Supplementary Results**

### 784 **2.1 Ancient DNA characterization**

785 We selected a subset of samples for the analysis of DNA damage patterns. In all of these  
786 samples, we observe expected patterns of damage in both mitochondrial and nuclear DNA,  
787 including evidence of the deamination of cytosine residues at the ends of reads, depurination-  
788 induced strand breaks, and a short mean DNA fragment length (Dabney, Meyer, & Pääbo, 2013)  
789 (Appendix 2-Figures 1-2). We note that the sample with the greatest proportion of deaminated  
790 cytosines is *E. cf. scotti* (YG 198.1; Appendix 2-Figure 1v-x), which is the oldest sample in the  
791 subset (Supplementary file 1).

792

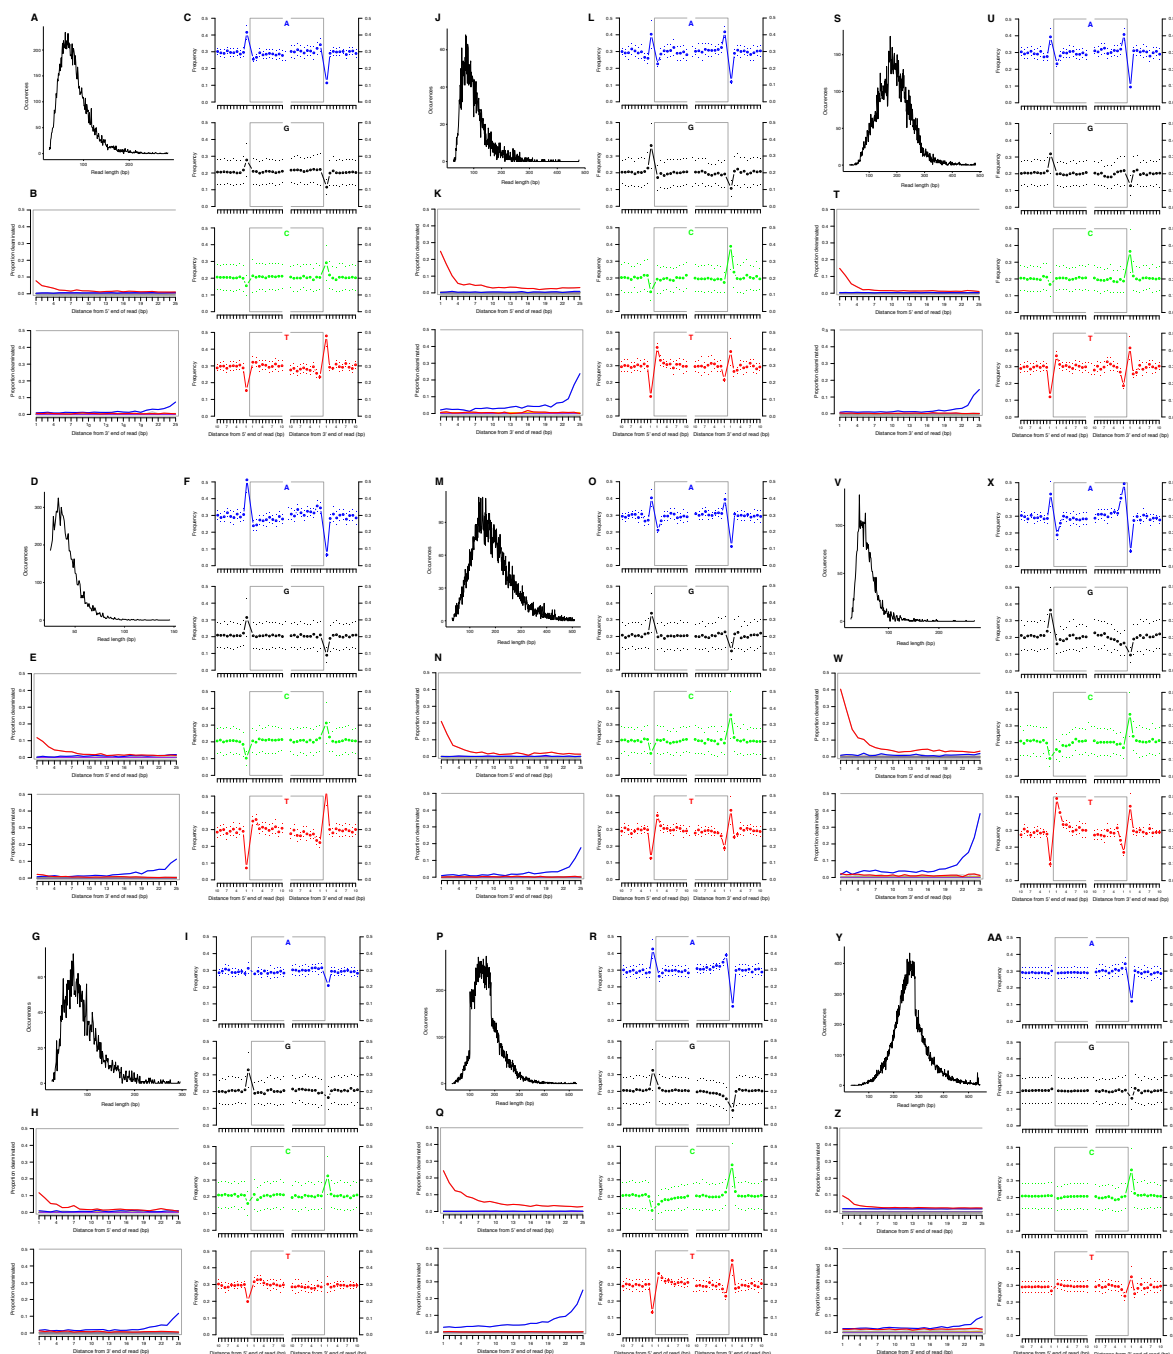

793

794 **Appendix 2-Figure 1.** Characterization of ancient mitochondrial DNA damage patterns from  
 795 nine equid samples. *H. francisci*: (A-C) JK166 (LACM(CIT) 109/150807; Nevada), (D-F) JK207  
 796 (LACM(CIT) 109/156450; Nevada), (G-I) JK260 (KU 47800; Wyoming), (J-L) PH013 (YG  
 797 130.6; Yukon), (M-O) PH047 (YG 404.663; Yukon), (P-R) MS272 (YG 401.268; Yukon), (S-U)

798 MS349 (YG 130.55; Yukon); *E. cf. scotti*: (V-X) PH055 (YG 198.1; Yukon); *E. lambei*: (Y-AA)  
 799 MS316 (YG 328.54; Yukon). Every third panel: (A) to (Y) DNA fragment length distributions;  
 800 (B) to (Z) proportion of cytosines that are deaminated at fragment ends (red: cytosine →  
 801 thymine; blue: guanine → adenine); and (C) to (AA) mean base frequencies immediately  
 802 upstream and downstream of the 5' and 3' ends of mapped reads.  
 803

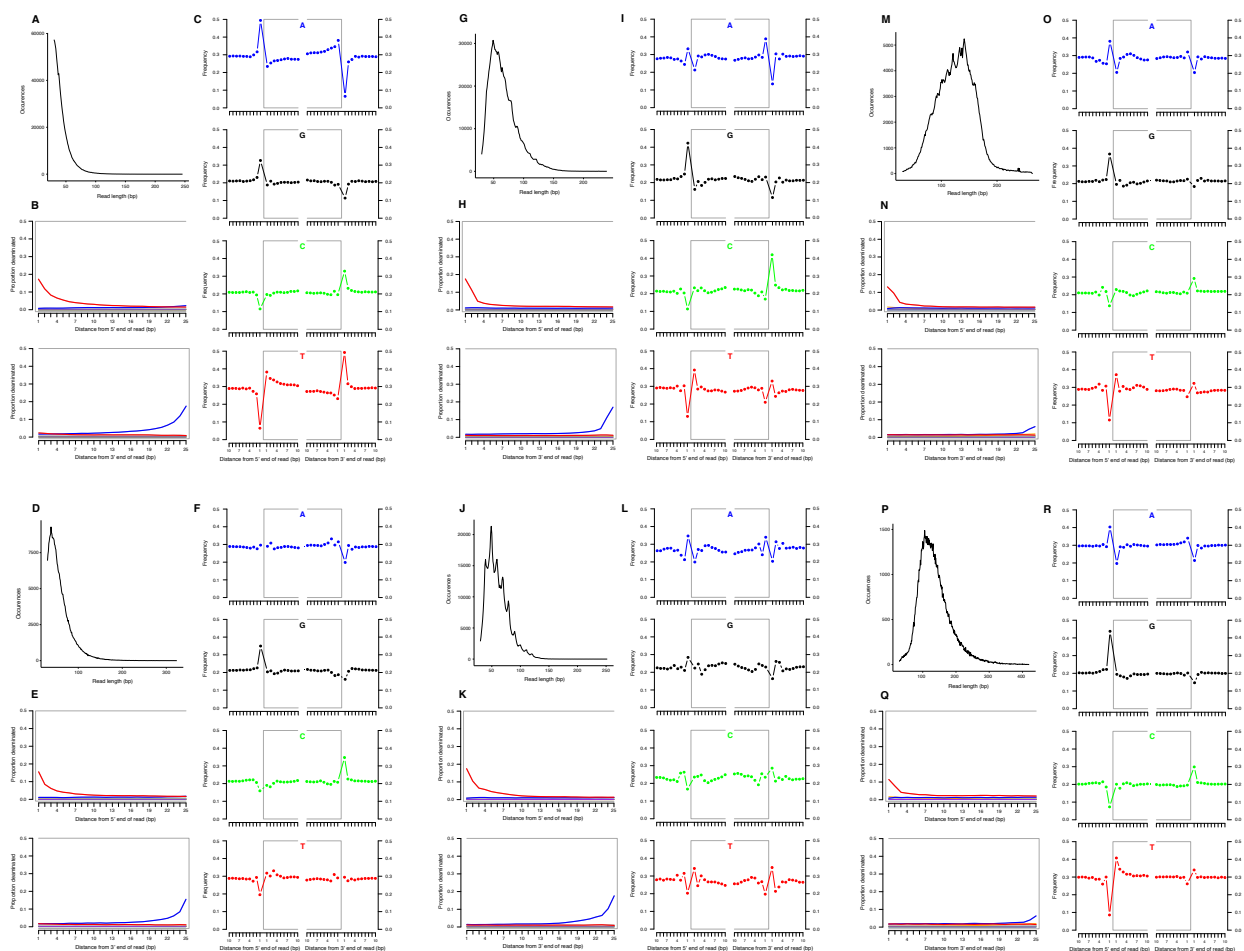

804  
 805 **Appendix 2-Figure 2.** Characterization of ancient nuclear DNA damage patterns from six *H.*  
 806 *francisci* samples. (A-C) JK166 (LACM(CIT) 109/150807; Nevada), (D-F) JK260 (KU 47800;  
 807 Wyoming), (G-I) PH013 (YG 130.6; Yukon), (J-L) PH036 (YG 76.2; Yukon), (M-O) MS349  
 808 (YG 130.55; Yukon), (P-R) MS439 (YG 401.387; Yukon). Every third panel: (A) to (P) DNA

809 fragment length distributions; (B) to (Q) proportion of cytosines that are deaminated at fragment  
810 ends (red: cytosine → thymine; blue: guanine → adenine); and (C) to (R) mean base frequencies  
811 immediately upstream and downstream of the 5' and 3' ends of mapped reads.

812

## 813 **2.2 Resolving the phylogenetic placement of NWSL equids using mitochondrial genomes**

814 We ran Bayesian and ML phylogenetic analyses on mtDNA genome alignment data sets 1-3,  
815 whilst varying the outgroup, including (all) or excluding (reduced) the fast-evolving partitions  
816 (see Appendix 1), and including or excluding the *Hippidion* sequences. In all analyses, we  
817 recover four major equid groups (*Hippidion*, NWSL equids(=*H. francisci*), caballine *Equus*, and  
818 non-caballine *Equus*) with strong statistical support (Bayesian posterior probability (BPP):  
819 1.000; ML bootstrap: 96-100%; Supplementary table 1), consistent with previous studies (e.g.  
820 (Der Sarkissian *et al.*, 2015; Orlando *et al.*, 2009)). We recover conflicting phylogenetic  
821 topologies between these four groups, however, which is dependent on the variables described  
822 above and the choice of phylogenetic algorithm (Appendix 2-Figure 3; Supplementary table 1).  
823 Across all analyses, strong statistical support (BPP:  $\geq 0.99$ ; ML bootstrap:  $\geq 95\%$ ) is only  
824 associated with topology 1 (Appendix 2-Figure 3; Supplementary table 1), in which NWSL  
825 equids are placed outside of *Equus*, and *Hippidion* is placed outside of the NWSL equid-*Equus*  
826 clade. We note that the analyses with the strongest support consist of multiple outgroups  
827 (mtDNA data set three).

828



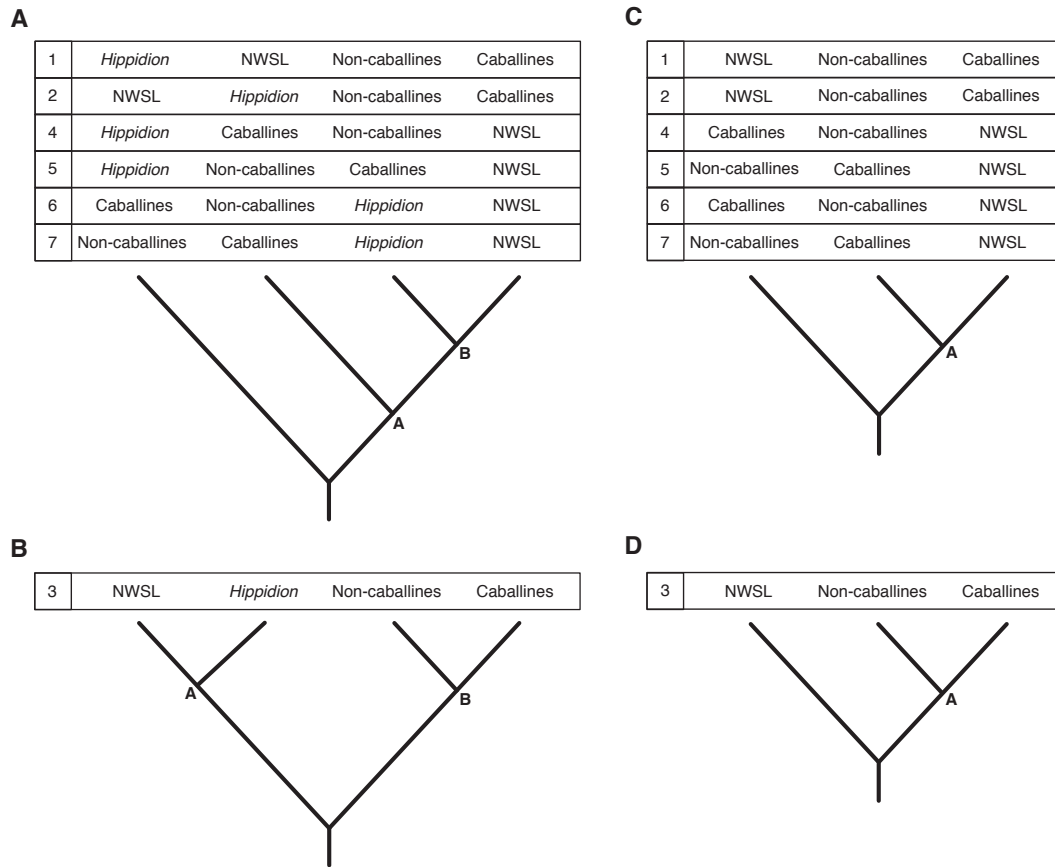

829

830 **Appendix 2-Figure 3.** Seven phylogenetic hypotheses for the four major groups of equids with

831 sequenced mitochondrial genomes: *Hippidion*, the New World stilt-legged equids

832 (= *Haringtonhippus*), non-caballine *Equus* (asses, zebras, and *E. ovodovi*) and caballine *Equus*

833 (horses). (A) imbalanced and (B) balanced hypotheses. The hypotheses presented in (C) and (D)

834 are identical to (A) and (B), except that *Hippidion* is excluded. Node letters are referenced in

835 Supplementary tables 1-2. We only list combinations that were recovered by our palaeogenomic,

836 or previous palaeogenetic, analyses

837

838 We further investigated the effect of outgroup choice by using an evolutionary placement

839 algorithm (EPA; (Berger *et al.*, 2011)) to place the outgroup sequences into an unrooted ML

840 phylogeny *a posteriori* using the same set of variables described above. We find that the

841 outgroup placement likelihood is increased with the inclusion of *Hippidion* sequences, and that  
842 the only placements with a likelihood of  $\geq 0.95$  are consistent with topology one (Appendix 2-  
843 Figure 3; Supplementary table 2), in agreement with the Bayesian and ML phylogenetic  
844 analyses. The phylogenetic and EPA analyses demonstrate that outgroup choice can greatly  
845 impact equid phylogenetic inference and that multiple outgroups should be used for resolving  
846 relationships between major equid groups.

847 We lastly ran Bayesian timetree analyses in BEAST in the absence of an outgroup, whilst  
848 including or excluding the fast-evolving partitions, including or excluding the *E. ovodovi*  
849 sequence, and constraining the root prior or not. All BEAST analyses yielded a maximum clade  
850 credibility tree that is consistent with topology one (Figures 1 and S11) with BPP support for the  
851 NWSL equid-*Equus* and *Equus* clades of 0.996-1.000 (Supplementary table 3). Altogether, the  
852 phylogenetic, EPA, and timetree analyses support topology one (Appendix 2-Figure 3), with  
853 NWSL equids falling outside of *Equus*, and therefore the NWSL equids as a separate genus,  
854 *Haringtonhippus*.

855

### 856 **2.3 Placement of previously published NWSL equid sequences**

857 To confirm that all six previously published NWSL equid samples with available mtDNA  
858 sequence data (Vilstrup *et al.*, 2013; Weinstock *et al.*, 2005) belong to *H. francisci*, we either  
859 reconstructed mitochondrial genomes for these samples (JW277, JW161; (Weinstock *et al.*,  
860 2005)), placed the sequences into a ML phylogeny *a posteriori* using the EPA whilst varying the  
861 partitioning scheme and inclusion or exclusion of *Hippidion* (Supplementary table 4), or both.  
862 For JW277 and JW161, the mitochondrial genomes were consistent with those derived from the  
863 newly analyzed samples (Figure 1-Figure supplement 1). For three other NWSL equid

864 mitochondrial sequences (JW125, JW126, and JW328; (Vilstrup *et al.*, 2013; Weinstock *et al.*,  
865 2005)), including one sample from Mineral Hill cave (Supplementary file 1), the EPA strongly  
866 supported a ML placement within the *H. francisci* clade (cumulative likelihood of 0.995-1.000).  
867 However, the EPA placed the remaining NWSL equid sample (MS272; (Vilstrup *et al.*, 2013))  
868 on the branch leading to *H. francisci* with strong support (likelihood: 1.000; Supplementary table  
869 4). We therefore explored whether the published sequence for MS272 is problematic.

870 We first tested the EPA on eight other equid mitochondrial sequences (*E. ovodovi*, n=3;  
871 *Hippidion devillei*, n=5), which grouped as expected from previous analyses (likelihood: 0.999-  
872 1.000; Supplementary table 4; (Orlando *et al.*, 2009)). We then used our mitochondrial genome  
873 assembly pipeline to reconstruct a consensus for MS272 from the raw data used by (Vilstrup *et*  
874 *al.*, 2013), which resulted in a different sequence that was consistent with other NWSL equids.  
875 To confirm this new sequence, we used the original MS272 DNA extract for library preparation,  
876 target enrichment, and sequencing. The consensus from this analysis was identical to our new  
877 sequence.

878 We sought to understand the origins of the problems associated with the published  
879 MS272 sequence. We first applied our synapomorphy analysis. For the called bases, we found  
880 that the published MS272 sequence contained 0/384 diagnostic bases for *Hippidion*, 124/164 for  
881 *Haringtonhippus*, and 16/70 for *Equus* (Supplementary file 5). We infer from this analysis that  
882 the published MS272 sequence is therefore ~76% *Haringtonhippus* and that ~23% originates  
883 from *Equus*. The presence of *Equus* synapomorphies could be explained by the fact that the  
884 enriched library for MS272 was sequenced on the same run as ancient caballine horses (*Equus*),  
885 thereby potentially introducing contaminating reads from barcode bleeding (Kircher, Sawyer, &  
886 Meyer, 2012), which may have been exacerbated by alignment to the modern horse reference

887 mitochondrial genome with BWA-aln and consensus calling using SAMtools (Vilstrup *et al.*,  
888 2013). The presence of caballine horse sequence in the published MS272 mtDNA genome  
889 explains why previous phylogenetic analyses of mitochondrial genomes have recovered NWSL  
890 equids as sister to caballine *Equus* with strong statistical support (Der Sarkissian *et al.*, 2015;  
891 Vilstrup *et al.*, 2013).

892

#### 893 **2.4 Resolving the phylogenetic placement of NWSL equids using nuclear genomes**

894 The horse and donkey genomes are representative of total *Equus* genomic diversity (Jónsson *et*  
895 *al.*, 2014), and so, if NWSL equids are *Equus*, we should expect their genomes to be more  
896 similar to either horse or donkey than to the alternative.

897 Initial analyses based on approach one (see Appendix 1) were inconclusive, with some  
898 NWSL equid samples appearing to fall outside of *Equus* (higher relative transversion frequency  
899 between the NWSL equid and the horse or donkey than between the horse and donkey) and  
900 others inconsistently placed in the phylogeny, appearing most closely related to horse when  
901 aligned to the horse genome and most closely related donkey when aligned to the donkey  
902 genome (Supplementary file 2). We then used approaches two and three in an attempt to  
903 standardize between the horse and donkey reference genomes, and therefore reduce potential  
904 bias introduced from the reference genome. In the latter union-based approach, mapping should  
905 not be disproportionately sensitive to regions of the genome where NWSL equids are more  
906 horse- or donkey-like. These approaches, however, were not successful, but we noted that  
907 relative (private) transversion frequency for the coordinate genome and NWSL equid sequences  
908 correlated with mean DNA fragment length (Appendix 2-Figure 4 and Supplementary file 2). We  
909 therefore used approach four to control for the large variation in mean DNA fragment length

910 between NWSL equid sequences (Appendix 2-Figure 2 and Supplementary file 2), which is  
911 likely due to a combination of DNA preservation and differences in the DNA extraction and  
912 library preparation techniques used (Supplementary file 2). This allowed for direct comparison  
913 between the NWSL equid samples, which showed a consistent pattern across read length bins  
914 (Figure 1-Figure supplement 2, Supplementary table 3). The relative private transversion  
915 frequency for both the coordinate genome and NWSL equid sequences increase with read length  
916 until the 90-99 bp bin, at which point the coordinate genome and alternate sequence relative  
917 private transversion frequencies converge (defined as a ratio between 0.95-1.05) and the NWSL  
918 equid relative private transversion frequencies reach plateau at between 1.40-1.56 $\times$  greater than  
919 that of the horse or donkey (Figure 1-Figure supplements 2-3, Supplementary table 3).

920 A greater relative private transversion frequency in NWSL equids, as compared to horse  
921 and donkey, is consistent with their being more diverged than the horse-donkey split (*Equus*) and  
922 therefore supports the hypothesis of NWSL equids as a separate genus (*Haringtonhippus*).

923

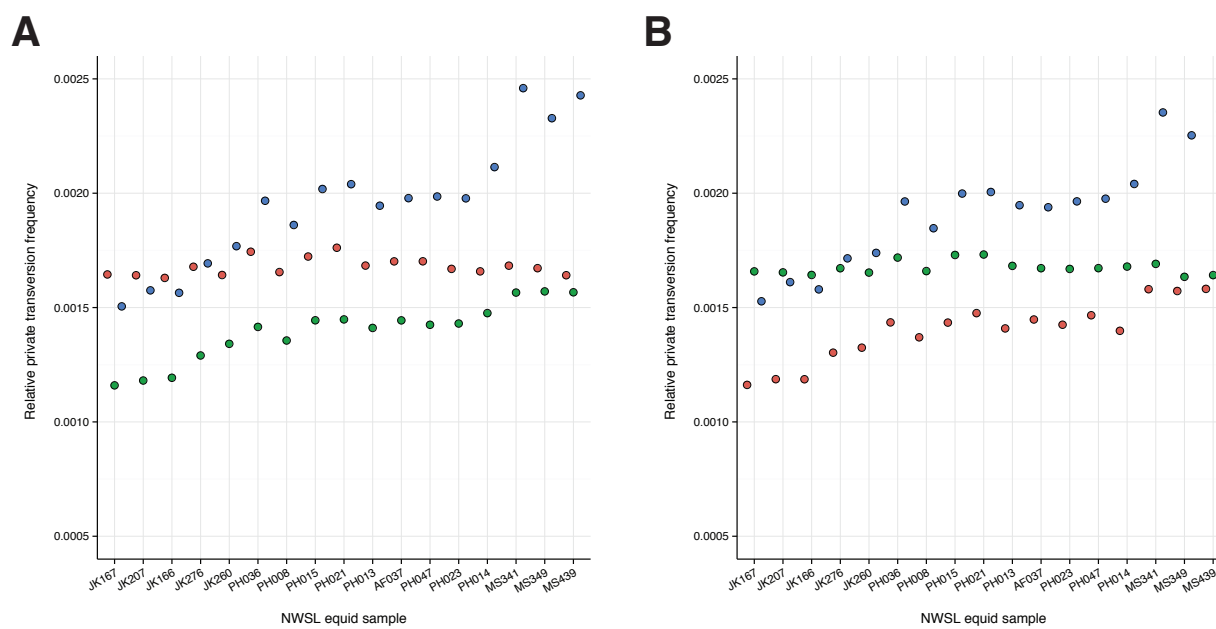

924

925 **Appendix 2-Figure 4.** A comparison of relative private transversion frequencies between the  
926 nuclear genomes of a caballine *Equus* (horse, *E. caballus*; green), a non-caballine *Equus*  
927 (donkey, *E. asinus*; red), and the 17 New World-stilt legged (NWSL) equid samples  
928 (= *Haringtonhippus francisci*; blue), using approach three (Appendix 1), with samples ordered by  
929 increasing mean mapped read length. Analyses are based on alignment to the horse (A) or  
930 donkey (B) genome coordinates.

931

### 932 **2.5 Sex determination from nuclear genomes**

933 We inferred the sex of our 17 NWSL equid samples by calculating the ratio of relative mapping  
934 frequencies between the autosomes and X-chromosome (Supplementary file 3). We find that five  
935 of our samples are male and at least eight are female (Supplementary table 6). We note that all  
936 three Gypsum Cave samples are inferred to be female, have statistically indistinguishable  
937 radiocarbon dates, and identical mtDNA genome sequences (Figure 1-Figure supplement 1b,  
938 Supplementary file 1). We therefore cannot reject the possibility that these samples derive from  
939 the same individual. Intriguingly, we further note that, across all 17 NWSL equid samples, the  
940 relative mapping frequency for chromosomes 8 and 13 is appreciably greater than the remaining  
941 autosomes (Supplementary file 3). This may suggest that duplicated regions of these  
942 chromosomes are present in NWSL equids, as compared to the horse (*E. caballus*).

943

### 944 **2.6 Designation of a type species for *Haringtonhippus***

945 We sought to designate a type species for the NWSL equid genus, *Haringtonhippus*, using an  
946 existing name, in order to avoid adding to the unnecessarily extensive list of Pleistocene North  
947 American equid species names (Winans, 1985). For this, we scrutinized eight names that have

948 previously been assigned to NWSL equids in order of priority (date the name was first described  
949 in the literature). We rejected names that were solely based on dentitions, as these anatomical  
950 features are insufficient for delineating between equid groups (Groves & Willoughby, 1981). The  
951 earliest named species with a valid, diagnostic holotype is *francisci* Hay 1915. On the basis of  
952 taxonomic priority, stratigraphic age, and cranial and metatarsal comparisons (see main results  
953 and below), we conclude that *francisci* Hay 1915 is the most appropriate name for  
954 *Haringtonhippus*. We also note that this middle Pleistocene species is also small, like our late  
955 Pleistocene specimens.

956 The eight examined names were:

957 ***tau*** Owen, 1869: a small species erected based upon an upper cheek tooth series lacking the P<sup>2</sup>  
958 from the Valley of Mexico. Other than small size, the species has no reliably diagnostic features.  
959 The holotype specimen has been lost, and no topotypal material is available, and so determining  
960 whether or not the species represents a NWSL equid is impossible. Eisenmann and colleagues  
961 (2008) proposed a neotype specimen for the species, consisting of a cranium (FC 673), but this is  
962 rejected here on technical grounds: 1) the proposed neotype fossil was listed as being part of a  
963 private collection, which negates its use as a neotype; 2) ICZN rules require that a neotype be  
964 "consistent with what is known of the former name-bearing type from the original description  
965 and from other sources" and derive from "as nearly as practicable from the original type locality  
966 ... and, where relevant, from the same geological horizon or host species as the original name-  
967 bearing type".

968 ***semiplicatus*** Cope, 1893: based upon an isolated upper molar tooth from Rock Creek, Texas.

969 The specimen has been interpreted to be derived from the same species as the holotype

970 metatarsal of '*E. calobatus* Troxell (see below) (Azzaroli, 1995; Quinn, 1957; Sandom, Faurby,  
971 Sandel, & Svenning, 2014).

972 *littoralis* Hay, 1913: based upon an upper cheek tooth from Peace Creek, Florida. The tooth is  
973 small, but offers no diagnostic features.

974 *francisci* Hay, 1915: Named in April of 1915 based upon a partial skeleton, including the skull,  
975 mandible, and a broken MTIII (TMM 34-2518). Confidently determined to be a NWSL equid  
976 based upon reconstruction of the right MTIII by Lundelius and Stevens (1970).

977 *calobatus* Troxell, 1915: Named in June of 1915 based upon limb bones. No holotype  
978 designated, but lectotype erected by Hibbard (1953) (YPM 13470, right MTIII).

979 *altidens* Quinn, 1957: based upon a partial skeleton from Blanco Creek, Texas that exhibits  
980 elongate metapodials. Synonymized with *francisci* Hay by Winans (1985).

981 *zoyatalis* Mooser, 1958: based upon a partial mandible including the symphyseal region and the  
982 right dentary with p2-m3. Synonymized with *francisci* Hay by Winans (1985).

983 *quinni* Slaughter *et al.* 1962: based upon a MTIII (SMP 60578) and other referred elements from  
984 Texas. Synonymized with *francisci* Hay by Lundelius and Stevens (1970) and Winans (1985).

985

## 986 **2.7 Anatomical comparison of the *francisci* holotype and Gypsum Cave crania**

987 We compared the holotype of *francisci* Hay (TMM 34-2518) from Texas to the Gypsum Cave  
988 cranium (LACM(CIT) 109/156450) from Nevada, the latter of which was assigned to  
989 *Haringtonhippus* using palaeogenomic data (Figure 2-Figure supplement 1). Although there are  
990 minor anatomical differences between the two crania, which are outlined below, we consider  
991 these to fall within the range of intraspecific variation.



992           The skull from Gypsum Cave (GCS) can be distinguished from that of the *francisci*  
993 holotype (*fHS*) by its slightly larger size, and markedly longer and more slender rostrum, both  
994 absolutely and as a percentage of the skull length. The rostrum of the GCS is also absolutely  
995 narrower; the *fHS*, despite being the smaller skull, is transversely broader at the  $i/3$ . The palatine  
996 foramina are positioned medial to the middle of the  $M^2$  in the GCS, whereas they are medial to  
997 the  $M^2$ - $M^3$  junction in the *fHS*. Viewed laterally, the orbits of the GCS have more pronounced  
998 supraorbital ridges than those of the *fHS*. The latter skull also exhibits somewhat stronger  
999 basicranial flexion than the GCS. Dentally, the GCS exhibits arcuate protocones, with strong  
1000 anterior heels and marked lingual troughs in  $P^3$ - $M^3$ ; the *fHS* has smaller, triangular protocones  
1001 with less pronounced anterior heels and no lingual trough or groove. These characters are not  
1002 thought to result from different ontogenetic stages, since both specimens appear to be of young  
1003 adults (all teeth in wear and tall in the jaw). Both the GCS and the *fHS* have relatively simple  
1004 enamel patterns on the cheek teeth, with few evident plications. Not only are the observed  
1005 differences between these two specimens unlikely to result from ontogeny, they also don't result  
1006 from sex, since both skulls appear to be females given the absence of canine teeth. The inference  
1007 of the GCS being female is further supported by palaeogenomic data (Supplementary table 6).  
1008

## 1009 **2.8 Attempt to recover DNA from the *francisci* holotype**

1010 We attempted to retrieve endogenous mitochondrial and nuclear DNA from the holotype of  
1011 *francisci* Hay (TMM 34-2518), to directly link this anatomically-derived species name with our  
1012 palaeogenomically-derived genus name *Haringtonhippus*, but were unsuccessful.

1013           After sequencing a library enriched for equid mitochondrial DNA (see Appendix 1), we  
1014 could only align 11 reads to the horse reference mitochondrial genome sequence with BWA.

1015 Using the basic local alignment search tool (BLASTn), we show that these reads are 100% match  
1016 to human and therefore likely originate from contamination. We repeated this approach using  
1017 MIA and aligned 166 reads, which were concentrated in 20 regions of the mitochondrial genome.  
1018 We identified these sequences as human (n=18, 96-100% identity), cow (n=1, 100%), or Aves  
1019 (n=1, 100%), consistent with the absence of endogenous mitochondrial DNA in this sample.

1020 We further generated ~800,000 reads from the unenriched library for TMM 34-2518, and  
1021 followed a modified metagenomic approach, outlined in (Graham *et al.*, 2016), to assess if any  
1022 endogenous DNA was present. We mapped the reads to the horse reference genome (EquCab2),  
1023 using the BWA-aln settings of (Graham *et al.*, 2016), of which 538 reads aligned. We then  
1024 compared these aligned reads to the BLASTn database. None of the reads uniquely hit Equidae  
1025 or had a higher score to Equidae than non-Equidae, whereas 492 of the reads either uniquely hit  
1026 non-Equidae or had a higher score to non-Equidae than Equidae. These results are consistent  
1027 with either a complete lack, or an ultra-low occurrence, of endogenous DNA in TMM 34-2518.

1028

## 1029 **2.9 Morphometric analysis of third metatarsals**

1030 Stilt- and stout-legged equids can be distinguished with high accuracy (98.2%; logistic  
1031 regression) on the basis of third metatarsal (MTIII) morphology (Figure 2c, and Supplementary  
1032 files 3 and 5), which has the potential to easily and confidently distinguish candidates from either  
1033 group prior to more costly genetic testing. We note that future genetic analysis of ambiguous  
1034 specimens, that cross the ‘middle ground’ between stilt- and stout-legged regions of  
1035 morphospace, could open the possibility of a simple length-vs-width definition for these two  
1036 morphotypes. Furthermore, we can highlight potential misidentifications, such as the two  
1037 putative *E. lambei* specimens that fall within stilt-legged morphospace (Figure 2c), which could

1038 then be tested by genetic analysis. Intriguingly, an Old World *E. ovodovi* (stilt-legged; MT no. 6;  
1039 (Eisenmann & Sergej, 2011))) and New World *E. scotti* (stout-legged; CMN 29867) specimen  
1040 directly overlap in a stout-legged region of morphospace (Figure 2c), which could indicate that  
1041 either this *E. ovodovi* specimen was misidentified or that this species straddles the delineation  
1042 between stilt- and stout-legged morphologies.

1043 *H. francisci* occupies a region of morphospace distinct from caballine/stout-legged  
1044 *Equus*, but overlaps considerably with hemionine/stilt-legged *Equus* (Figure 2c). The holotype of  
1045 *H. francisci* (TMM 34-2518) is very pronounced in its slenderness; it has a greater MTIII length  
1046 than most other *H. francisci* but slightly smaller width/breadth measurements. This holotype is  
1047 surpassed in these dimensions only by the *quinni* Slaughter *et al.* holotype, which has itself  
1048 previously been synonymized with *francisci* Hay (Lundelius & Stevens, 1970; Winans, 1985).  
1049 This suggests a potentially larger range of MTIII morphology for *H. francisci* than exhibited by  
1050 the presently assigned specimens. We observe that this diversity may be influenced by  
1051 geography, with *H. francisci* specimens from high-latitude Beringia having shorter MTIIIs  
1052 relative to those from the lower-latitude contiguous USA.

1053 We note that two New World caballine *Equus* from Yukon, *E. cf. scotti* and *E. lambei*,  
1054 appear to separate in morphospace (Figure 2c), primarily by MTIII length, supporting the  
1055 potential delineation of these two taxa using MTIII morphology alone.

1056

1057 **Acknowledgements**

1058 We thank the Klondike placer gold mining community of Yukon for their support and providing  
1059 access to their mines from which many of our *Haringtonhippus* fossils were recovered. We thank  
1060 Matt Brown and Chris Sagebiel of the Texas Vertebrate Palaeontology Collections at the  
1061 University of Texas, Austin for access to a portion of TMM 34-2518, and also thank Sam  
1062 McLeod, Vanessa Rhue, and Aimee Montenegro at the Los Angeles County Museum for access  
1063 to the Gypsum Cave material for consumptive sampling. Thanks to Brent Breithaupt (Bureau of  
1064 Land Management) for permitting the sampling of fossils from Natural Trap Cave that were  
1065 originally recovered by Larry Martin, Miles Gilbert, and colleagues, and are presently curated by  
1066 the University of Kansas Biodiversity Institute. We thank Chris Beard and David Burnham  
1067 (University of Kansas) for facilitating access to these fossils. Thanks to Tom Guilderson,  
1068 Andrew Fields, Dan Chang, and Samuel Vohr for technical assistance. Thanks to Greger Larson  
1069 for providing the base map in Figure 1. We thank two anonymous reviewers whose comments  
1070 improved this manuscript. This work used the Vincent J. Coates Genomics Sequencing  
1071 Laboratory at UC Berkeley, supported by NIH S10 Instrumentation Grants S10RR029668 and  
1072 S10RR027303. PDH, JAC, MS, and BS were supported by NSF grants PLR-1417036 and  
1073 09090456. LO was supported by the Danish Council for Independent Research Natural Sciences  
1074 (Grant 4002-00152B); the Danish National Research Foundation (Grant); the “Chaires  
1075 d'Attractivit. 2014” IDEX, University of Toulouse, France (OURASI), and the European  
1076 Research Council (ERC-CoG-2015-681605).

1077

1078 **Competing interests**

1079 The authors declare no competing interests.

1080 **References**

- 1081 Allen, W. R., & Short, R. V. (1997). Interspecific and extraspecific pregnancies in equids:  
1082 anything goes. *The Journal of Heredity*, 88(5), 384–392.
- 1083 Azzaroli, A. (1992). Ascent and decline of monodactyl equids: a case for prehistoric overkill.  
1084 *Annales Zoologici Fennici*, 28(3-4), 151–163.
- 1085 Azzaroli, A. (1995). A synopsis of the Quaternary species of *Equus* in North America. *Bolletino*  
1086 *Della Societa Palaeontologica Italiana*, 34(2), 205–221.
- 1087 Azzaroli, A., & Voorhies, M. R. (1993). The Genus *Equus* in North America. The Blancan  
1088 species. *Palaeontographia Italica*, 80, 175–198.
- 1089 Beaumont, W., Beverly, R., Southon, J., & Taylor, R. E. (2010). Bone preparation at the  
1090 KCCAMS laboratory. *Nuclear Instruments & Methods in Physics Research. Section B,*  
1091 *Beam Interactions with Materials and Atoms*, 268(7-8), 906–909.
- 1092 Bennett, E. A., Champlot, S., Peters, J., Arbuckle, B. S., Guimaraes, S., Pruvost, M., ... Geigl,  
1093 E.-M. (2017). Taming the Late Quaternary phylogeography of the Eurasian wild ass  
1094 through ancient and modern DNA. *PLoS One*, 12(4), e0174216.
- 1095 Berger, S. A., Krompass, D., & Stamatakis, A. (2011). Performance, accuracy, and Web server  
1096 for evolutionary placement of short sequence reads under maximum likelihood. *Systematic*  
1097 *Biology*, 60(3), 291–302.
- 1098 Briggs, A. W., Good, J. M., Green, R. E., Krause, J., Maricic, T., Stenzel, U., ... Pääbo, S.  
1099 (2009). Targeted retrieval and analysis of five Neandertal mtDNA genomes. *Science*,  
1100 325(5938), 318–321.

- 1101 Burke, A., Eisenmann, V., & Ambler, G. K. (2003). The systematic position of *Equus*  
1102 *hydruntinus*, an extinct species of Pleistocene equid☆. *Quaternary Research*, 59(3), 459–  
1103 469.
- 1104 Clark, P. U., Dyke, A. S., Shakun, J. D., Carlson, A. E., Clark, J., Wohlfarth, B., ... McCabe, A.  
1105 M. (2009). The Last Glacial Maximum. *Science*, 325(5941), 710–714.
- 1106 Dabney, J., Knapp, M., Glocke, I., Gansauge, M.-T., Weihmann, A., Nickel, B., ... Meyer, M.  
1107 (2013). Complete mitochondrial genome sequence of a Middle Pleistocene cave bear  
1108 reconstructed from ultrashort DNA fragments. *Proceedings of the National Academy of*  
1109 *Sciences of the United States of America*, 110(39), 15758–15763.
- 1110 Dabney, J., Meyer, M., & Pääbo, S. (2013). Ancient DNA damage. *Cold Spring Harbor*  
1111 *Perspectives in Biology*, 5(7). <https://doi.org/10.1101/cshperspect.a012567>
- 1112 Darriba, D., Taboada, G. L., Doallo, R., & Posada, D. (2012). jModelTest 2: more models, new  
1113 heuristics and parallel computing. *Nature Methods*, 9(8), 772.
- 1114 Der Sarkissian, C., Vilstrup, J. T., Schubert, M., Seguin-Orlando, A., Eme, D., Weinstock, J., ...  
1115 Orlando, L. (2015). Mitochondrial genomes reveal the extinct *Hippidion* as an outgroup to  
1116 all living equids. *Biology Letters*, 11(3), 20141058–20141058.
- 1117 Drummond, A. J., Suchard, M. A., Xie, D., & Rambaut, A. (2012). Bayesian phylogenetics with  
1118 BEAUti and the BEAST 1.7. *Molecular Biology and Evolution*, 29(8), 1969–1973.
- 1119 Edgar, R. C. (2004). MUSCLE: multiple sequence alignment with high accuracy and high  
1120 throughput. *Nucleic Acids Research*, 32(5), 1792–1797.
- 1121 Eisenmann, V. (1985). Indications paléoécologiques fournies par les *Equus* (Mammalia,  
1122 Perissodactyla) plio-pléistocènes d’Afrique. In *L’Environnement des Hominidés au Plio-*  
1123 *Pléistocène* (pp. 57–79).

- 1124 Eisenmann, V. (1992). Origins, dispersals, and migrations of *Equus* (Mammalia, Perissodactyla).  
1125 *CFS Courier Forschungsinstitut Senckenberg*, 153, 161–170.
- 1126 Eisenmann, V. (2003). Gigantic Horses. In A. Petculescu & E. Stiuca (Eds.), *Advances in*  
1127 *Palaeontology “Hen to Panta”, Papers in Honour of C. Radulescu and P. M. Samson* (pp.  
1128 31–40). Bucharest.
- 1129 Eisenmann, V., Alberdi, M. T., deGiuli, C., & Staesche, U. (1988). Volume 1: methodology. In  
1130 M. Woodburne & P. Sondaar (Eds.), *Studying Fossil Horses* (pp. 1–71). E. J. Brill, Leiden.
- 1131 Eisenmann, V., Howe, J., & Pichardo, M. (2008). Old world hemiones and new world slender  
1132 species (Mammalia, Equidae). *Palaeovertebrata*, 36(1-4), 159–233.
- 1133 Eisenmann, V., & Sergej, V. (2011). Unexpected finding of a new *Equus* species (Mammalia,  
1134 Perissodactyla) belonging to a supposedly extinct subgenus in late Pleistocene deposits of  
1135 Khakassia (Southwestern Siberia). *Geodiversitas*, 33(3), 519–530.
- 1136 Enk, J., Devault, A., Widga, C., Saunders, J., Szpak, P., Southon, J., ... Poinar, H. (2016).  
1137 *Mammuthus* population dynamics in Late Pleistocene North America: divergence,  
1138 phylogeography, and introgression. *Frontiers in Ecology and Evolution*, 4.  
1139 <https://doi.org/10.3389/fevo.2016.00042>
- 1140 Forsten, A. (1988). Middle Pleistocene replacement of stenorid horses by caballoid horses —  
1141 ecological implications. *Palaeogeography, Palaeoclimatology, Palaeoecology*, 65(1-2), 23–  
1142 33.
- 1143 Forsten, A. (1992). Mitochondrial-DNA time-table and the evolution of *Equus*: comparison of  
1144 molecular and palaeontological evidence. *Annales Zoologici Fennici*, 28(3-4), 301–309.
- 1145 Forsten, A. (1996). Climate and the evolution of *Equus* (Perissodactyla, Equidae) in the Plio-  
1146 Pleistocene of Eurasia. *Acta Zoologica Cracoviensia*, 39(1), 161–166.

- 1147 Froese, D. G., Stiller, M., Heintzman, P. D., Reyes, A. V., Zazula, G. D., Soares, A. E. R., ...  
1148 Shapiro, B. (2017). New fossil and genomic evidence constrains the timing of bison arrival  
1149 in North America. *Proceedings of the National Academy of Sciences of the United States of*  
1150 *America*, *114*(13), 3457–3462.
- 1151 Froese, D. G., Zazula, G. D., Westgate, J. A., Preece, S. J., Sanborn, P. T., Reyes, A. V., &  
1152 Pearce, N. J. G. (2009). The Klondike goldfields and Pleistocene environments of Beringia.  
1153 *GSA Today: A Publication of the Geological Society of America*, *19*(8), 4.
- 1154 Goebel, T., Waters, M. R., & O'Rourke, D. H. (2008). The late Pleistocene dispersal of modern  
1155 humans in the Americas. *Science*, *319*(5869), 1497–1502.
- 1156 Graham, R. W., Belmecheri, S., Choy, K., Culleton, B. J., Davies, L. J., Froese, D., ... Wooller,  
1157 M. J. (2016). Timing and causes of mid-Holocene mammoth extinction on St. Paul Island,  
1158 Alaska. *Proceedings of the National Academy of Sciences of the United States of America*,  
1159 *113*(33), 9310–9314.
- 1160 Groves, C. P., & Willoughby, D. P. (1981). Studies on the taxonomy and phylogeny of the genus  
1161 *Equus*. 1. Subgeneric classification of the recent species. *Mammalia*, *45*(3).  
1162 <https://doi.org/10.1515/mamm.1981.45.3.321>
- 1163 Guthrie, R. D. (2003). Rapid body size decline in Alaskan Pleistocene horses before extinction.  
1164 *Nature*, *426*(6963), 169–171.
- 1165 Guthrie, R. D. (2006). New carbon dates link climatic change with human colonization and  
1166 Pleistocene extinctions. *Nature*, *441*(7090), 207–209.
- 1167 Harington, C. R. (2011). Pleistocene vertebrates of the Yukon Territory. *Quaternary Science*  
1168 *Reviews*, *30*(17-18), 2341–2354.



- 1169 Harington, C. R., & Clulow, F. V. (1973). Pleistocene Mammals from Gold Run Creek, Yukon  
1170 Territory. *Canadian Journal of Earth Sciences*, 10(5), 697–759.
- 1171 Hay, O. P. (1915). Contributions to the knowledge of the mammals of the Pleistocene of North  
1172 America. *Proceedings of the United States National Museum*, 48(2086), 515–575.
- 1173 Heintzman, P. D., Zazula, G. D., Cahill, J. A., Reyes, A. V., MacPhee, R. D. E., & Shapiro, B.  
1174 (2015). Genomic data from extinct North American *Camelops* revise camel evolutionary  
1175 history. *Molecular Biology and Evolution*, 32(9), 2433–2440.
- 1176 Hibbard, C. W. (1953). *Equus (Asinus) calobatus* Troxell and associated vertebrates from the  
1177 Pleistocene of Kansas. *Transactions of the Kansas Academy of Science. Kansas Academy of*  
1178 *Science*, 56(1), 111.
- 1179 Jónsson, H., Ginolhac, A., Schubert, M., Johnson, P. L. F., & Orlando, L. (2013).  
1180 mapDamage2.0: fast approximate Bayesian estimates of ancient DNA damage parameters.  
1181 *Bioinformatics* , 29(13), 1682–1684.
- 1182 Jónsson, H., Schubert, M., Seguin-Orlando, A., Ginolhac, A., Petersen, L., Fumagalli, M., ...  
1183 Orlando, L. (2014). Speciation with gene flow in equids despite extensive chromosomal  
1184 plasticity. *Proceedings of the National Academy of Sciences of the United States of America*,  
1185 111(52), 18655–18660.
- 1186 Kearse, M., Moir, R., Wilson, A., Stones-Havas, S., Cheung, M., Sturrock, S., ... Drummond, A.  
1187 (2012). Geneious Basic: an integrated and extendable desktop software platform for the  
1188 organization and analysis of sequence data. *Bioinformatics* , 28(12), 1647–1649.
- 1189 Kircher, M., Sawyer, S., & Meyer, M. (2012). Double indexing overcomes inaccuracies in  
1190 multiplex sequencing on the Illumina platform. *Nucleic Acids Research*, 40(1), e3.

- 1191 Koch, P. L., & Barnosky, A. D. (2006). Late Quaternary extinctions: state of the debate. *Annual*  
1192 *Review of Ecology, Evolution, and Systematics*, 37(1), 215–250.
- 1193 Langmead, B., & Salzberg, S. L. (2012). Fast gapped-read alignment with Bowtie 2. *Nature*  
1194 *Methods*, 9(4), 357–359.
- 1195 Li, H., & Durbin, R. (2010). Fast and accurate long-read alignment with Burrows-Wheeler  
1196 transform. *Bioinformatics*, 26(5), 589–595.
- 1197 Li, H., Handsaker, B., Wysoker, A., Fennell, T., Ruan, J., Homer, N., ... 1000 Genome Project  
1198 Data Processing Subgroup. (2009). The Sequence Alignment/Map format and SAMtools.  
1199 *Bioinformatics*, 25(16), 2078–2079.
- 1200 Lundelius, E. L., & Stevens, M. S. (1970). *Equus francisci* Hay, a Small Stilt-Legged Horse,  
1201 Middle Pleistocene of Texas. *Journal of Palaeontology*, 44(1), 148–153.
- 1202 Macdonald, M. L., & Toohey, L. M. (1992). *The Species, Genera, and Tribes of the Living and*  
1203 *Extinct Horses of the World 1758-1966: From the Work of Morris F. Skinner*.
- 1204 MacFadden, B. J. (1992). *Fossil horses: systematics, palaeobiology, and evolution of the family*  
1205 *Equidae*. Cambridge University Press.
- 1206 Macfadden, B. J. (1998). Equidae. In *Evolution of Tertiary Mammals of North America* (pp. 537–  
1207 559).
- 1208 Meyer, M., & Kircher, M. (2010). Illumina sequencing library preparation for highly multiplexed  
1209 target capture and sequencing. *Cold Spring Harbor Protocols*, 2010(6), db.prot5448.
- 1210 O’Dea, A., Lessios, H. A., Coates, A. G., Eytan, R. I., Restrepo-Moreno, S. A., Cione, A. L., ...  
1211 Jackson, J. B. C. (2016). Formation of the Isthmus of Panama. *Science Advances*, 2(8),  
1212 e1600883.

- 1213 Orlando, L., Ginolhac, A., Zhang, G., Froese, D., Albrechtsen, A., Stiller, M., ... Willerslev, E.  
1214 (2013). Recalibrating *Equus* evolution using the genome sequence of an early Middle  
1215 Pleistocene horse. *Nature*, 499(7456), 74–78.
- 1216 Orlando, L., Male, D., Alberdi, M. T., Prado, J. L., Prieto, A., Cooper, A., & Hänni, C. (2008).  
1217 Ancient DNA clarifies the evolutionary history of American Late Pleistocene equids.  
1218 *Journal of Molecular Evolution*, 66(5), 533–538.
- 1219 Orlando, L., Mashkour, M., Burke, A., Douady, C. J., Eisenmann, V., & Hänni, C. (2006).  
1220 Geographic distribution of an extinct equid (*Equus hydruntinus*: Mammalia, Equidae)  
1221 revealed by morphological and genetical analyses of fossils. *Molecular Ecology*, 15(8),  
1222 2083–2093.
- 1223 Orlando, L., Metcalf, J. L., Alberdi, M. T., Telles-Antunes, M., Bonjean, D., Otte, M., ...  
1224 Cooper, A. (2009). Revising the recent evolutionary history of equids using ancient DNA.  
1225 *Proceedings of the National Academy of Sciences of the United States of America*, 106(51),  
1226 21754–21759.
- 1227 Quinn, J. H. (1957). Pleistocene Equidae of Texas. *Bureau of Economic Geology, University of*  
1228 *Texas, Report of Investigations*, 33, 1–51.
- 1229 R Development Core Team. (2008). *R: A language and environment for statistical computing*.  
1230 Retrieved from R Foundation for Statistical Computing, Vienna, Austria. ISBN 3-900051-  
1231 07-0, URL <http://www.R-project.org>.
- 1232 Reimer, P. J., Bard, E., Bayliss, A., Beck, J. W., Blackwell, P. G., Bronk Ramsey, C., ... van der  
1233 Plicht, J. (2013). IntCal13 and Marine13 radiocarbon age calibration curves 0–50,000 years  
1234 cal BP. *Radiocarbon*, 55(4), 1869–1887.

- 1235 Rohland, N., Siedel, H., & Hofreiter, M. (2010). A rapid column-based ancient DNA extraction  
1236 method for increased sample throughput. *Molecular Ecology Resources*, *10*(4), 677–683.
- 1237 Ronquist, F., Teslenko, M., van der Mark, P., Ayres, D. L., Darling, A., Höhna, S., ...  
1238 Huelsenbeck, J. P. (2012). MrBayes 3.2: efficient Bayesian phylogenetic inference and  
1239 model choice across a large model space. *Systematic Biology*, *61*(3), 539–542.
- 1240 Rybczynski, N., Gosse, J. C., Harington, C. R., Wogelius, R. A., Hidy, A. J., & Buckley, M.  
1241 (2013). Mid-Pliocene warm-period deposits in the High Arctic yield insight into camel  
1242 evolution. *Nature Communications*, *4*, 1550.
- 1243 Ryder, O. A., Epel, N. C., & Benirschke, K. (1978). Chromosome banding studies of the  
1244 Equidae. *Cytogenetics and Cell Genetics*, *20*(1-6), 332–350.
- 1245 Sandom, C., Faurby, S., Sandel, B., & Svenning, J.-C. (2014). Global late Quaternary megafauna  
1246 extinctions linked to humans, not climate change. *Proceedings. Biological Sciences / The  
1247 Royal Society*, *281*(1787). <https://doi.org/10.1098/rspb.2013.3254>
- 1248 Schmieder, R., & Edwards, R. (2011). Quality control and preprocessing of metagenomic  
1249 datasets. *Bioinformatics*, *27*(6), 863–864.
- 1250 Schubert, M., Ginolhac, A., Lindgreen, S., Thompson, J. F., Al-Rasheid, K. A. S., Willerslev, E.,  
1251 ... Orlando, L. (2012). Improving ancient DNA read mapping against modern reference  
1252 genomes. *BMC Genomics*, *13*, 178.
- 1253 Scott, E. (2004). Pliocene and Pleistocene Horses from Porcupine Cave. In *Biodiversity Response  
1254 to Climate Change in the Middle Pleistocene* (pp. 264–279).
- 1255 Skinner, M. F., & Hibbard, C. W. (1972). Early Pleistocene pre-glacial and glacial rocks and  
1256 faunas of North-Central Nebraska. *Bulletin of the American Museum of Natural History*,  
1257 *148*, 1–148.

- 1258 Stamatakis, A. (2014). RAxML version 8: a tool for phylogenetic analysis and post-analysis of  
1259 large phylogenies. *Bioinformatics*, 30(9), 1312–1313.
- 1260 Steiner, C. C., & Ryder, O. A. (2013). Characterization of *Prdm9* in equids and sterility in mules.  
1261 *PloS One*, 8(4), e61746.
- 1262 Vilstrup, J. T., Seguin-Orlando, A., Stiller, M., Ginolhac, A., Raghavan, M., Nielsen, S. C. A., ...  
1263 Orlando, L. (2013). Mitochondrial phylogenomics of modern and ancient equids. *PloS One*,  
1264 8(2), e55950.
- 1265 Weinstock, J., Willerslev, E., Sher, A., Tong, W., Ho, S. Y. W., Rubenstein, D., ... Cooper, A.  
1266 (2005). Evolution, systematics, and phylogeography of Pleistocene horses in the new world:  
1267 a molecular perspective. *PLoS Biology*, 3(8), e241.
- 1268 Welker, F., Collins, M. J., Thomas, J. A., Wadsley, M., Brace, S., Cappellini, E., ... MacPhee, R.  
1269 D. E. (2015). Ancient proteins resolve the evolutionary history of Darwin's South American  
1270 ungulates. *Nature*, 522(7554), 81–84.
- 1271 Winans, M. C. (1985). Revision of North American fossil species of the genus *Equus*  
1272 (Mammalia: Perissodactyla: Equidae). Dissertation, Univ. of Texas, Austin. 264 pp.
- 1273 Zazula, G. D., MacPhee, R. D. E., Metcalfe, J. Z., Reyes, A. V., Brock, F., Druckenmiller, P. S.,  
1274 ... Southon, J. R. (2014). American mastodon extirpation in the Arctic and Subarctic  
1275 predates human colonization and terminal Pleistocene climate change. *Proceedings of the*  
1276 *National Academy of Sciences of the United States of America*, 111(52), 18460–18465.
- 1277

1278 **Supplementary tables 1-8**

1279

1280 **Supplementary table 1.** Topological shape and support values for the best supported trees from the Bayesian and Maximum likelihood  
 1281 (ML) analyses of mtDNA data sets 1-3, including either the all or reduced partition sets, and with *Hippidion* sequences either included  
 1282 or excluded.

| Outgroup                         | Partitions | <i>Hippidion</i> ? | Tips | MrBayes          |               |               |                  |       |       |            | RAxML     |             |             |                  |      |     |            |
|----------------------------------|------------|--------------------|------|------------------|---------------|---------------|------------------|-------|-------|------------|-----------|-------------|-------------|------------------|------|-----|------------|
|                                  |            |                    |      | Topology         | Support       |               |                  |       |       |            | Topology  | Support     |             |                  |      |     |            |
|                                  |            |                    |      |                  | Node A        | Node B        | <i>Hippidion</i> | NWSL  | NCs   | Caballines |           | Node A      | Node B      | <i>Hippidion</i> | NWSL | NCs | Caballines |
| White rhino<br>(Data set 1)      | All        | Excluded           | 63   | <b>1 / 2 / 3</b> | <b>0.996*</b> | N/A           | N/A              | 1.000 | 1.000 | 1.000      | 1 / 2 / 3 | 71*         | N/A         | N/A              | 100  | 99  | 100        |
|                                  |            | Included           | 69   | 2                | 0.751         | <b>1.000*</b> | 1.000            | 1.000 | 1.000 | 1.000      | 1         | 64*         | <b>96*</b>  | 100              | 100  | 100 | 100        |
|                                  | Reduced    | Excluded           | 63   | <b>1 / 2 / 3</b> | <b>1.000*</b> | N/A           | N/A              | 1.000 | 1.000 | 1.000      | 1 / 2 / 3 | <b>100*</b> | N/A         | N/A              | 99   | 100 | 100        |
|                                  |            | Included           | 69   | 2                | 0.948         | <b>1.000*</b> | 1.000            | 1.000 | 1.000 | 1.000      | 2         | 73          | <b>98*</b>  | 100              | 99   | 100 | 100        |
| Malayan tapir<br>(Data set 2)    | All        | Excluded           | 63   | 5 / 7            | 0.971         | N/A           | N/A              | 1.000 | 1.000 | 1.000      | 5 / 7     | 87          | N/A         | N/A              | 100  | 99  | 99         |
|                                  |            | Included           | 69   | 6                | 0.808         | 0.867         | 1.000            | 1.000 | 1.000 | 1.000      | 6         | 55          | 63          | 100              | 100  | 100 | 100        |
|                                  | Reduced    | Excluded           | 63   | 1 / 2 / 3        | 0.675*        | N/A           | N/A              | 1.000 | 1.000 | 1.000      | 4 / 6     | 28          | N/A         | N/A              | 100  | 96  | 98         |
|                                  |            | Included           | 69   | 3                | 0.685         | 0.864*        | 1.000            | 1.000 | 1.000 | 1.000      | 3         | 70          | 69          | 100              | 100  | 100 | 100        |
| Dog+ceratomorphs<br>(Data set 3) | All        | Excluded           | 71   | 1 / 2 / 3        | 0.598*        | N/A           | N/A              | 1.000 | 1.000 | 1.000      | 4 / 6     | 59          | N/A         | N/A              | 100  | 100 | 100        |
|                                  |            | Included           | 77   | <b>1</b>         | <b>1.000*</b> | <b>1.000*</b> | 1.000            | 1.000 | 1.000 | 1.000      | 1         | 94*         | <b>96*</b>  | 100              | 100  | 100 | 100        |
|                                  | Reduced    | Excluded           | 71   | <b>1 / 2 / 3</b> | <b>0.999*</b> | N/A           | N/A              | 1.000 | 1.000 | 1.000      | 1 / 2 / 3 | <b>97*</b>  | N/A         | N/A              | 100  | 100 | 100        |
|                                  |            | Included           | 77   | <b>1</b>         | <b>1.000*</b> | <b>1.000*</b> | 1.000            | 1.000 | 1.000 | 1.000      | 1         | <b>99*</b>  | <b>100*</b> | 100              | 100  | 100 | 100        |

1283

1284 Topology numbers and node letters refer to those outlined in Appendix 2-figure 3. Bayesian posterior probability support of >0.99 and  
 1285 ML bootstrap support of >95% are in bold for nodes A and B. \*support for nodes that are consistent with topology 1 in Appendix 2-  
 1286 figure 3. NCs: non-caballines.



1288 **Supplementary table 2.** The *a posteriori* phylogenetic placement likelihood for eight ceratomorph  
 1289 (rhino and tapir) outgroups using a ML evolutionary placement algorithm, whilst varying the partition  
 1290 set used (all or reduced), and either including or excluding *Hippidion* sequences.

| <i>Hippidion?</i> | Outgroup                                   | Partitions<br>Topology | All             |                  |              |              |   | Reduced          |              |              |   |       |
|-------------------|--------------------------------------------|------------------------|-----------------|------------------|--------------|--------------|---|------------------|--------------|--------------|---|-------|
|                   |                                            |                        | 1               | 2                | 3            | 6            | 7 | 1                | 2            | 3            | 6 | 7     |
| Included          | <i>Tapirus terrestris</i> (AJ428947)       |                        | 0.457           | 0.317            | 0.205        | 0.018        |   | 0.410            | 0.391        | 0.199        |   |       |
| Included          | <i>Tapirus indicus</i> (NC023838)          |                        | 0.276           | 0.105            | 0.225        | 0.389        |   | 0.536            | 0.298        | 0.166        |   |       |
| Included          | <i>Coelodonta antiquitatis</i> (NC012681)  |                        | <b>0.998</b>    |                  |              |              |   | 0.411            | 0.554        | 0.035        |   |       |
| Included          | <i>Dicerorhinus sumatrensis</i> (NC012684) |                        | <b>0.981</b>    |                  | 0.009        |              |   | <b>0.983</b>     | 0.015        |              |   |       |
| Included          | <i>Rhinoceros unicornis</i> (NC001779)     |                        | <b>0.998</b>    |                  |              |              |   | <b>0.998</b>     |              |              |   |       |
| Included          | <i>Rhinoceros sondaicus</i> (NC012683)     |                        | <b>0.989</b>    | 0.006            |              |              |   | 0.895            | 0.102        |              |   |       |
| Included          | <i>Ceratotherium simum</i> (NC001808)      |                        | 0.448           | 0.499            | 0.052        |              |   | 0.296            | 0.704        |              |   |       |
| Included          | <i>Diceros bicornis</i> (NC012682)         |                        | 0.918           | 0.065            | 0.018        |              |   | <b>0.996</b>     |              |              |   |       |
|                   |                                            |                        | <b>Topology</b> | <b>1 / 2 / 3</b> | <b>4 / 6</b> | <b>5 / 7</b> |   | <b>1 / 2 / 3</b> | <b>4 / 6</b> | <b>5 / 7</b> |   |       |
| Excluded          | <i>Tapirus terrestris</i> (AJ428947)       |                        |                 | 0.550            | 0.312        | 0.138        |   | <b>0.987</b>     |              |              |   | 0.012 |
| Excluded          | <i>Tapirus indicus</i> (NC023838)          |                        |                 | 0.050            | 0.908        | 0.041        |   | <b>0.995</b>     |              |              |   |       |
| Excluded          | <i>Coelodonta antiquitatis</i> (NC012681)  |                        |                 | 0.248            | 0.451        | 0.301        |   | <b>1.000</b>     |              |              |   |       |
| Excluded          | <i>Dicerorhinus sumatrensis</i> (NC012684) |                        |                 | 0.155            | 0.553        | 0.291        |   | <b>1.000</b>     |              |              |   |       |
| Excluded          | <i>Rhinoceros unicornis</i> (NC001779)     |                        |                 | 0.530            | 0.334        | 0.136        |   | <b>1.000</b>     |              |              |   |       |
| Excluded          | <i>Rhinoceros sondaicus</i> (NC012683)     |                        |                 | 0.733            | 0.196        | 0.071        |   | <b>1.000</b>     |              |              |   |       |
| Excluded          | <i>Ceratotherium simum</i> (NC001808)      |                        |                 | 0.949            | 0.018        | 0.033        |   | <b>1.000</b>     |              |              |   |       |
| Excluded          | <i>Diceros bicornis</i> (NC012682)         |                        |                 | 0.851            | 0.073        | 0.075        |   | <b>1.000</b>     |              |              |   |       |

1291

1292 The best supported placement for each analysis has been given a gray background, and likelihoods  
 1293 >0.95 are in bold. Topology numbers refer to those outlined in Appendix 2-figure 3. Genbank  
 1294 accession numbers are given in parentheses after outgroup names.

1295



1296 **Supplementary table 3.** Bayesian time tree analysis results, with support and estimated divergence times for major nodes, and the  
 1297 tMRCAs for *Haringtonhippus*, *E. asinus*, and *E. quagga* summarized.

| <i>E. ovodovi</i> ? | Partition | Root prior      | <i>Hippidion-<br/>Haringtonhippus/Equus</i> |           | <i>Haringtonhippus-Equus</i> |             | <i>Equus</i> |             |             | <i>Haringtonhippus</i> |           |             | <i>E. asinus</i> |           |             | <i>E. quagga</i> |           |             |             |
|---------------------|-----------|-----------------|---------------------------------------------|-----------|------------------------------|-------------|--------------|-------------|-------------|------------------------|-----------|-------------|------------------|-----------|-------------|------------------|-----------|-------------|-------------|
|                     |           |                 | Node height                                 |           | Posterior                    | Node height |              | Posterior   | Node height |                        | Posterior | Node height |                  | Posterior | Node height |                  | Posterior | Node height |             |
|                     |           |                 | Median                                      | 95% HPD   |                              | Median      | 95% HPD      |             | Median      | 95% HPD                |           | Median      | 95% HPD          |           | Median      | 95% HPD          |           | Median      | 95% HPD     |
| Included            | All       | Constrained     | 6.19                                        | 5.22-7.23 | 0.999                        | 4.59        | 4.18-5.06    | 1.000       | 4.10        | 3.81-4.39              | 1.000     | 0.264       | 0.198-0.348      | 1.000     | 0.720       | 0.556-0.916      | 1.000     | 0.599       | 0.449-0.770 |
|                     |           | Not constrained | 6.20                                        | 5.20-7.24 | 1.000                        | 4.59        | 4.17-5.04    | 1.000       | 4.10        | 3.81-4.38              | 1.000     | 0.263       | 0.196-0.342      | 1.000     | 0.719       | 0.549-0.906      | 1.000     | 0.600       | 0.446-0.770 |
|                     | Reduced   | Constrained     | 6.30                                        | 5.15-7.50 | 0.997                        | 4.58        | 4.11-5.11    | 0.998       | 4.08        | 3.77-4.36              | 1.000     | 0.334       | 0.224-0.463      | 1.000     | 0.755       | 0.544-0.992      | 1.000     | 0.605       | 0.411-0.816 |
|                     |           | Not constrained | 6.35                                        | 5.21-7.60 | 0.996                        | 4.59        | 4.09-5.09    | 0.996       | 4.08        | 3.79-4.38              | 1.000     | 0.335       | 0.228-0.465      | 1.000     | 0.755       | 0.550-0.998      | 1.000     | 0.605       | 0.412-0.821 |
| Excluded            | All       | Constrained     | 6.21                                        | 5.22-7.21 | 1.000                        | 4.58        | 4.16-5.04    | 1.000       | 4.10        | 3.81-4.39              | 1.000     | 0.269       | 0.200-0.352      | 1.000     | 0.735       | 0.561-0.924      | 1.000     | 0.608       | 0.459-0.777 |
|                     |           | Not constrained | 6.29                                        | 5.33-7.33 | 1.000                        | 4.60        | 4.17-5.05    | 1.000       | 4.11        | 3.81-4.40              | 1.000     | 0.273       | 0.200-0.354      | 1.000     | 0.742       | 0.560-0.921      | 1.000     | 0.618       | 0.463-0.791 |
|                     | Reduced   | Constrained     | 6.44                                        | 5.36-7.63 | 0.999                        | 4.60        | 4.12-5.11    | 0.998       | 4.08        | 3.78-4.36              | 1.000     | 0.338       | 0.227-0.466      | 1.000     | 0.778       | 0.570-1.020      | 1.000     | 0.609       | 0.431-0.851 |
|                     |           | Not constrained | 6.49                                        | 5.38-7.66 | 0.999                        | 4.61        | 4.13-5.13    | 0.999       | 4.09        | 3.79-4.38              | 1.000     | 0.339       | 0.228-0.467      | 1.000     | 0.781       | 0.574-1.027      | 1.000     | 0.614       | 0.423-0.819 |
| <b>Range</b>        |           |                 | 6.19-6.49                                   | 5.15-7.66 | 0.996-1.000                  | 4.58-4.61   | 4.09-5.13    | 0.996-1.000 | 4.08-4.11   | 3.77-4.40              | 1.000     | 0.263-0.339 | 0.196-0.467      | 1.000     | 0.719-0.781 | 0.544-1.027      | 1.000     | 0.599-0.618 | 0.411-0.851 |

1298

1299 All analyses supported topology 1 in Appendix 2-figure 3. HPD: highest posterior density.

1300

1301 **Supplementary table 4.** The *a posteriori* phylogenetic placement likelihood for 12 published equid  
 1302 mitochondrial sequences using the ML evolutionary placement algorithm, whilst varying the partition  
 1303 set used (all or reduced), and either including or excluding *Hippidion* sequences.

| <i>Hippidion?</i> | Published sample              | Partitions |                                | All                           |                | Reduced           |                |                   |
|-------------------|-------------------------------|------------|--------------------------------|-------------------------------|----------------|-------------------|----------------|-------------------|
|                   |                               | Placement  | Sister to<br><i>E. ovodovi</i> | Sister to<br><i>Hippidion</i> | Within<br>NWSL | Sister to<br>NWSL | Within<br>NWSL | Sister to<br>NWSL |
| Included          | <i>E. ovodovi</i> (ACAD2305)  |            | 1.000                          |                               |                |                   | N/A            | N/A               |
| Included          | <i>E. ovodovi</i> (ACAD2302)  |            | 1.000                          |                               |                |                   | N/A            | N/A               |
| Included          | <i>E. ovodovi</i> (ACAD2303)  |            | 1.000                          |                               |                |                   | N/A            | N/A               |
| Included          | <i>H. devillei</i> (ACAD3615) |            |                                | 1.000                         |                |                   | N/A            | N/A               |
| Included          | <i>H. devillei</i> (ACAD3625) |            |                                | 1.000                         |                |                   | N/A            | N/A               |
| Included          | <i>H. devillei</i> (ACAD3627) |            |                                | 1.000                         |                |                   | N/A            | N/A               |
| Included          | <i>H. devillei</i> (ACAD3628) |            |                                | 0.999                         |                |                   | N/A            | N/A               |
| Included          | <i>H. devillei</i> (ACAD3629) |            |                                | 0.999                         |                |                   | N/A            | N/A               |
| Included          | NWSL equid (JW125)            |            |                                |                               | 0.996          |                   | N/A            | N/A               |
| Included          | NWSL equid (JW126)            |            |                                |                               | 0.999          |                   | N/A            | N/A               |
| Included          | NWSL equid (JW328; JX312726)  |            |                                |                               | 1.000          |                   | 0.996          |                   |
| Included          | NWSL equid (MS272; JX312727)  |            |                                |                               |                | 1.000             |                | 1.000             |
| Excluded          | <i>E. ovodovi</i> (ACAD2305)  |            | 1.000                          |                               |                |                   | N/A            | N/A               |
| Excluded          | <i>E. ovodovi</i> (ACAD2302)  |            | 1.000                          |                               |                |                   | N/A            | N/A               |
| Excluded          | <i>E. ovodovi</i> (ACAD2303)  |            | 1.000                          |                               |                |                   | N/A            | N/A               |
| Excluded          | NWSL equid (JW125)            |            |                                |                               | 0.996          |                   | N/A            | N/A               |
| Excluded          | NWSL equid (JW126)            |            |                                |                               | 0.999          |                   | N/A            | N/A               |
| Excluded          | NWSL equid (JW328; JX312726)  |            |                                |                               | 1.000          |                   | 0.995          |                   |
| Excluded          | NWSL equid (MS272; JX312727)  |            |                                |                               |                | 1.000             |                | 1.000             |

1304  
 1305 For mitochondrial genome sequences, sample names and Genbank accession numbers are given in  
 1306 parentheses after the species names. For short mitochondrial DNA fragments, sample names are given  
 1307 in parentheses after the species names.

1308

1309 **Supplementary table 5.** Summary of nuclear genome data from all 17 NWSL equids pooled together and analyzed using approach four.

| Genome coordinates | Fragment length bin (bp) | Count of all sites | Private transversion frequency |        |       |           |           |           |                               |             |               |                                    |              |               |
|--------------------|--------------------------|--------------------|--------------------------------|--------|-------|-----------|-----------|-----------|-------------------------------|-------------|---------------|------------------------------------|--------------|---------------|
|                    |                          |                    | Absolute                       |        |       | Relative  |           |           | Combined relative frequencies |             |               | Ratio between relative frequencies |              |               |
|                    |                          |                    | NWSL                           | Donkey | Horse | NWSL      | Donkey    | Horse     | NWSL+ Donkey                  | NWSL+ Horse | Donkey+ Horse | NWSL: Donkey                       | NWSL: Horse  | Donkey: Horse |
| Horse-based        | 30-39                    | 49318650           | 64465                          | 83016  | 53488 | 1.307E-03 | 1.683E-03 | 1.085E-03 | 2.990E-03                     | 2.392E-03   | 2.768E-03     | 0.777                              | 1.205        | 1.552         |
|                    | 40-49                    | 59781463           | 100232                         | 100055 | 73823 | 1.677E-03 | 1.674E-03 | 1.235E-03 | 3.350E-03                     | 2.912E-03   | 2.909E-03     | 1.002                              | 1.358        | 1.355         |
|                    | 50-59                    | 57405192           | 107455                         | 96797  | 75746 | 1.872E-03 | 1.686E-03 | 1.319E-03 | 3.558E-03                     | 3.191E-03   | 3.006E-03     | 1.110                              | 1.419        | 1.278         |
|                    | 60-69                    | 49392344           | 97377                          | 82944  | 68033 | 1.971E-03 | 1.679E-03 | 1.377E-03 | 3.651E-03                     | 3.349E-03   | 3.057E-03     | 1.174                              | 1.431        | 1.219         |
|                    | 70-79                    | 41109339           | 84198                          | 68807  | 58380 | 2.048E-03 | 1.674E-03 | 1.420E-03 | 3.722E-03                     | 3.468E-03   | 3.094E-03     | 1.224                              | 1.442        | 1.179         |
|                    | 80-89                    | 28683294           | 65569                          | 47845  | 44893 | 2.286E-03 | 1.668E-03 | 1.565E-03 | 3.954E-03                     | 3.851E-03   | 3.233E-03     | 1.370                              | 1.461        | 1.066         |
|                    | 90-99                    | 17754307           | 43342                          | 29760  | 29359 | 2.441E-03 | 1.676E-03 | 1.654E-03 | 4.117E-03                     | 4.095E-03   | 3.330E-03     | 1.456                              | 1.476        | 1.014         |
|                    | 100-109                  | 10556561           | 26655                          | 17725  | 17424 | 2.525E-03 | 1.679E-03 | 1.651E-03 | 4.204E-03                     | 4.176E-03   | 3.330E-03     | 1.504                              | 1.530        | 1.017         |
|                    | 110-119                  | 6384882            | 16336                          | 10713  | 10562 | 2.559E-03 | 1.678E-03 | 1.654E-03 | 4.236E-03                     | 4.213E-03   | 3.332E-03     | 1.525                              | 1.547        | 1.014         |
|                    | 120-129                  | 3664296            | 9435                           | 6159   | 6052  | 2.575E-03 | 1.681E-03 | 1.652E-03 | 4.256E-03                     | 4.226E-03   | 3.332E-03     | 1.532                              | 1.559        | 1.018         |
|                    | <b>Total/Mean:</b>       | 38360046           | 95768                          | 64357  | 63397 | 2.525E-03 | 1.678E-03 | 1.652E-03 | 4.203E-03                     | 4.177E-03   | 3.331E-03     | 1.504                              | <b>1.528</b> | 1.016         |
| Donkey-based       | 30-39                    | 28276643           | 38149                          | 30750  | 47684 | 1.349E-03 | 1.087E-03 | 1.686E-03 | 2.437E-03                     | 3.035E-03   | 2.774E-03     | 1.241                              | 0.800        | 0.645         |
|                    | 40-49                    | 34035949           | 56874                          | 41946  | 57300 | 1.671E-03 | 1.232E-03 | 1.684E-03 | 2.903E-03                     | 3.355E-03   | 2.916E-03     | 1.356                              | 0.993        | 0.732         |
|                    | 50-59                    | 32495044           | 60172                          | 43517  | 54413 | 1.852E-03 | 1.339E-03 | 1.675E-03 | 3.191E-03                     | 3.526E-03   | 3.014E-03     | 1.383                              | 1.106        | 0.800         |
|                    | 60-69                    | 27941039           | 54058                          | 38665  | 46445 | 1.935E-03 | 1.384E-03 | 1.662E-03 | 3.319E-03                     | 3.597E-03   | 3.046E-03     | 1.398                              | 1.164        | 0.832         |
|                    | 70-79                    | 23282014           | 46578                          | 33146  | 38794 | 2.001E-03 | 1.424E-03 | 1.666E-03 | 3.424E-03                     | 3.667E-03   | 3.090E-03     | 1.405                              | 1.201        | 0.854         |
|                    | 80-89                    | 16178161           | 36031                          | 25345  | 27071 | 2.227E-03 | 1.567E-03 | 1.673E-03 | 3.794E-03                     | 3.900E-03   | 3.240E-03     | 1.422                              | 1.331        | 0.936         |
|                    | 90-99                    | 9992386            | 23517                          | 16457  | 16802 | 2.353E-03 | 1.647E-03 | 1.681E-03 | 4.000E-03                     | 4.035E-03   | 3.328E-03     | 1.429                              | 1.400        | 0.979         |
|                    | 100-109                  | 5915994            | 14259                          | 9723   | 10014 | 2.410E-03 | 1.644E-03 | 1.693E-03 | 4.054E-03                     | 4.103E-03   | 3.336E-03     | 1.467                              | 1.424        | 0.971         |
|                    | 110-119                  | 3576444            | 8713                           | 5943   | 5996  | 2.436E-03 | 1.662E-03 | 1.677E-03 | 4.098E-03                     | 4.113E-03   | 3.338E-03     | 1.466                              | 1.453        | 0.991         |
|                    | 120-129                  | 2058710            | 5031                           | 3467   | 3414  | 2.444E-03 | 1.684E-03 | 1.658E-03 | 4.128E-03                     | 4.102E-03   | 3.342E-03     | 1.451                              | 1.474        | 1.016         |
|                    | <b>Total/Mean:</b>       | 21543534           | 51520                          | 35590  | 36226 | 2.411E-03 | 1.659E-03 | 1.677E-03 | 4.070E-03                     | 4.088E-03   | 3.336E-03     | 1.453                              | <b>1.437</b> | 0.989         |

1310

1311 Minimum and maximum NWSL:Equus ratios between relative frequencies are in bold, and are used for the divergence estimates in

1312 Figure 1-Figure supplement 3. Total and mean values are for the four longest bins only (90-99 to 120-129 bp). Mean values equally

1313 weight each length bin. bp: base pairs.

1314 **Supplementary table 6.** Sex determination analysis of 17 NWSL equids.

| <b>Sample</b> | <b>Museum accession</b> | <b>Chromosome ratio</b> | <b>Inferred sex</b> |
|---------------|-------------------------|-------------------------|---------------------|
| AF037         | YG 402.235              | 0.48                    | male                |
| JK166         | LACM(CIT) 109/150807    | 0.93                    | female              |
| JK167         | LACM(CIT) 109/149291    | 0.91                    | female              |
| JK207         | LACM(CIT) 109/156450    | 0.92                    | female              |
| JK260         | KU 47800                | 0.95                    | female              |
| JK276         | KU 53678                | 0.91                    | female              |
| MS341         | YG 303.1085             | 0.50                    | male                |
| MS349         | YG 130.55               | 0.48                    | male                |
| MS439         | YG 401.387              | 0.98                    | female              |
| PH008         | YG 404.205              | 0.90                    | female              |
| PH013         | YG 130.6                | 0.87                    | probable female     |
| PH014         | YG 303.371              | 0.46                    | male                |
| PH015         | YG 404.662              | 0.44                    | male                |
| PH021         | YG 29.169               | 0.83                    | probable female     |
| PH023         | YG 160.8                | 0.91                    | female              |
| PH036         | YG 76.2                 | 0.81                    | probable female     |
| PH047         | YG 404.663              | 0.88                    | probable female     |

1315

1316 Chromosome ratio is the relative mapping frequency ratio between all autosomes and the X-  
1317 chromosome. Males are inferred if the ratio is 0.45-0.55 and females if the ratio is 0.9-1.1.

1318

1319 **Supplementary table 7.** Summary of the number and type of synapomorphic bases for each of the  
1320 three examined equid genera.

| <b>Substitution</b> | <b><i>Hippidion</i></b> | <b><i>Haringtonhippus</i></b> | <b><i>Equus</i></b> |
|---------------------|-------------------------|-------------------------------|---------------------|
| Transition          | 338                     | 147                           | 66                  |
| Transversion        | 43                      | 22                            | 4                   |
| Insertion           | 2                       | 4                             | 0                   |
| Deletion            | 3                       | 0                             | 0                   |
| <b>Total*</b>       | 391                     | 178                           | 75                  |

1321

1322 A full list of these substitutions, and their position relative to the *E. caballus* reference mitochondrial  
1323 genome (NC\_001640), can be found in Supplementary file 5. \*total includes a further five  
1324 synapomorphic sites that have unique states in each genus.

1325

1326

1327 **Supplementary table 8.** Selected models of molecular evolution for partitions of the first five mtDNA genome alignment data sets.

| Data set                | Coding1 |         | Coding2 |         | Coding3 |         | rRNAs  |         | tRNAs  |         | CR     |          | Total length |         |
|-------------------------|---------|---------|---------|---------|---------|---------|--------|---------|--------|---------|--------|----------|--------------|---------|
|                         | Length  | Model   | Length  | Model   | Length  | Model   | Length | Model   | Length | Model   | Length | Model    | All          | Reduced |
| 1. White rhino out      | 3803    | GTR+I+G | 3803    | HKY+I+G | 3803    | GTR+I+G | 2579   | GTR+I+G | 1529   | HKY+I+G | 1066   | HKY*+I+G | 16583        | 11714   |
| 2. Malayan tapir out    | 3803    | GTR+I+G | 3803    | HKY+I+G | 3803    | GTR+I+G | 2585   | GTR+I+G | 1530   | HKY+I+G | 1065   | HKY*+G   | 16589        | 11721   |
| 3. Dog+ceratomorphs out | 3803    | GTR+I+G | 3803    | HKY+I+G | 3803    | GTR+I+G | 2615   | GTR+I+G | 1540   | HKY+I+G | N/A    | N/A      | 15564        | 11761   |
| 4. EPA                  | 3803    | GTR+I+G | 3803    | TrN+I+G | 3803    | GTR+I+G | 2601   | GTR+I+G | 1534   | HKY+I+G | 1118   | HKY+I+G  | 16662        | 11741   |
| 5. Equids               | 3802    | TrN+I+G | 3802    | TrN+I+G | 3802    | GTR+G   | 2571   | TrN+I+G | 1528   | HKY+I   | 971    | HKY+G    | 16476        | 11703   |

1328

1329 All lengths are in base pairs. Reduced length excludes the Coding3 and CR partitions. For all RAxML analyses the GTR model was  
 1330 implemented. \*The TrN model was selected, but this cannot be implemented in MrBayes and so the HKY model was used. EPA:  
 1331 evolutionary placement algorithm; CR: control region.

1332

1333

1334 **Supplementary files**

1335 **Supplementary file 1.** Metadata for all samples used in the mitochondrial genomic analyses.

1336

1337 **Supplementary file 2.** Statistics from the phylogenetic inference analyses of nuclear genomes  
1338 using all four approaches. (A) Read mapping statistics. (B) Relative transversion frequencies for  
1339 approaches 1-3. (C) Relative private transversion frequencies for approach 4.

1340

1341 **Supplementary file 3.** Data from the sex determination analyses.

1342

1343 **Supplementary file 4.** Measurement data for (A) equid third metatarsals, which were used in the  
1344 morphometrics analysis, and (B) other NWSL equid elements.

1345

1346 **Supplementary file 5.** A compilation of all 634 putative synapomorphic sites in the  
1347 mitochondrial genome for Hippidion, Haringtonhippus, and Equus (A), with a comparison to the  
1348 published MS272 mitochondrial genome sequence at the 140 sites with a base state that matches  
1349 one of the three genera (B).

1350

1351 **Supplementary file 6.** Rscript used for the morphometric analysis.

1352

1353 **Supplementary file 7.** TREE files of all mitochondrial trees generated by this study.

1354

1355 **Supplementary file 8.** NEXUS files of all six mitochondrial genome alignment data sets.

1356

1357 **Supplementary file 9.** XML files for all BEAST analyses.
